1 **A genetically-encoded toolkit of functionalized nanobodies against fluorescent proteins**  
2 **for visualizing and manipulating intracellular signalling**

3

4 **David L. Prole<sup>1,\*</sup> and Colin W. Taylor<sup>1,\*</sup>**

5 <sup>1</sup>Department of Pharmacology, University of Cambridge, Tennis Court Road, Cambridge  
6 CB2 1PD, United Kingdom

7

8 **\*For correspondence:** dp350@cam.ac.uk, cwt1000@cam.ac.uk

9

10 **Short title**

11 Functionalized nanobodies for studying intracellular signalling

12

13 **Keywords:** cell signalling, endoplasmic reticulum, fluorescence microscopy, fluorescent  
14 protein, GFP, intrabody, membrane contact site, mitochondria, nanobody, RFP.

15 **Abbreviations**

16 BFP, blue fluorescent protein;  $[Ca^{2+}]_c$ , cytosolic free  $Ca^{2+}$  concentration; CALI,  
17 chromophore-assisted light inactivation; CaM, calmodulin; CFP, cyan fluorescent protein;  
18 ER, endoplasmic reticulum; FKBP, FK506-binding protein; FRB, FKBP-rapamycin-binding  
19 domain; FP, fluorescent protein; GFP, green fluorescent protein; GNab, GFP-binding  
20 nanobody; HBS, HEPES-buffered saline; IP<sub>3</sub>R, inositol 1,4,5-trisphosphate receptor;  
21 LAMP1, lysosomal membrane protein 1; mCherry, monomeric Cherry; MCS, membrane  
22 contact site; MHBS, modified HBS; MP, multimerizing protein; mRFP, monomeric red  
23 fluorescent protein; OMM, outer mitochondrial membrane; PM, plasma membrane; RFP, red  
24 fluorescent protein; RNab, RFP-binding nanobody; ROI, region of interest; SOCE, store-  
25 operated  $Ca^{2+}$  entry; TIRFM, total internal reflection fluorescence microscopy; YFP, yellow  
26 fluorescent protein.

27 **Abstract**

28 **Background:** Intrabodies enable targeting of proteins in live cells, but it remains a huge task  
29 to generate specific intrabodies against the thousands of proteins in a proteome. We leverage  
30 the widespread availability of fluorescently labelled proteins to visualize and manipulate  
31 intracellular signalling pathways in live cells by using nanobodies targeting fluorescent  
32 protein tags.

33 **Results:** We generated a toolkit of plasmids encoding nanobodies against red and green  
34 fluorescent proteins (RFP and GFP variants), fused to functional modules. These include  
35 fluorescent sensors for visualization of  $\text{Ca}^{2+}$ ,  $\text{H}^+$  and ATP/ADP dynamics; oligomerizing or  
36 heterodimerizing modules that allow recruitment or sequestration of proteins and  
37 identification of membrane contact sites between organelles; SNAP tags that allow labelling  
38 with fluorescent dyes and targeted chromophore-assisted light inactivation; and nanobodies  
39 targeted to luminal sub-compartments of the secretory pathway. We also developed two  
40 methods for crosslinking tagged proteins: a dimeric nanobody, and RFP-targeting and GFP-  
41 targeting nanobodies fused to complementary hetero-dimerizing domains. We show various  
42 applications of the toolkit and demonstrate, for example, that  $\text{IP}_3$  receptors deliver  $\text{Ca}^{2+}$  to the  
43 outer membrane of only a subset of mitochondria, and that only one or two sites on a  
44 mitochondrion form membrane contacts with the plasma membrane.

45 **Conclusions:** This toolkit greatly expands the utility of intrabodies for studying cell  
46 signalling in live cells.

## 47 **Background**

48 Visualizing the location of specific proteins within cells and manipulating their function is  
49 crucial for understanding cell biology. Antibodies can define protein locations in fixed and  
50 permeabilized cells, but antibodies are large protein complexes that are difficult to introduce  
51 into live cells [1]. This limits their ability to interrogate the dynamics or affect the function of  
52 proteins in live cells. Small protein-based binders, including nanobodies derived from the  
53 variable region of the heavy chains ( $V_{HH}$ ) of camelid antibodies, offer a promising alternative  
54 [2]. Nanobodies can be encoded by plasmids and expressed in live cells. However, generating  
55 nanobodies against thousands of protein variants is daunting, and even for single targets it  
56 can be time-consuming, costly and not always successful. A solution to this bottleneck is  
57 provided by fluorescently tagged proteins, which are widely used in cell biology [3, 4] after  
58 heterologous expression of proteins or gene editing of endogenous proteins [5-7]. The most  
59 common application of fluorescent protein (FP) tags is to visualize protein locations, but they  
60 have additional potential as generic affinity tags to manipulate and visualize protein functions  
61 in live cells. These opportunities are under-developed.

62 Green fluorescent protein (GFP) has undergone numerous cycles of optimization as a  
63 reporter and non-perturbing tag [3, 8]. Most GFP-tagged proteins therefore retain their  
64 endogenous localization and function [9]. Large libraries of plasmids encoding GFP-tagged  
65 proteins are now available [10]. Proteome-scale expression of GFP-tagged proteins or  
66 genome-scale tagging of gene products with GFP has been reported for *Drosophila* [11],  
67 fungi [12-14], plants [15, 16] and bacteria [17].

68 Proteins tagged with red fluorescent proteins (RFPs) such as DsRed, mRFP and mCherry  
69 (mCh) are also popular. Extensive optimization has made them attractive tags [3, 18], and  
70 libraries of RFP-tagged proteins have been developed in mouse stem cells [19] and yeast  
71 [14].

72 Nanobodies that bind to RFP [20, 21] or GFP [21, 22] are most commonly used in their  
73 purified forms for immunoprecipitation and immunocytochemistry. However, they also offer  
74 a generic means of targeting in live cells the huge variety of available tagged proteins and the  
75 many emerging examples of endogenous proteins tagged with FPs by gene editing. GFP-  
76 targeting nanobodies have been used for applications such as targeted proteosomal  
77 degradation [23, 24] and relocation of proteins in cells [25], but these and other applications  
78 are less developed for RFP-targeting nanobodies.

79 Here we develop a plasmid-encoded toolkit of nanobodies that bind common FP tags,  
80 including RFPs, CFP, GFP and YFP, fused to functional modules for visualization and  
81 manipulation of cell signalling (*Fig. 1*). We fused the nanobodies to a variety of functional  
82 modules: fluorescent sensors for  $\text{Ca}^{2+}$ ,  $\text{H}^+$  and ATP/ADP; optimized SNAP tags for labelling  
83 with bright and photostable dyes [26]; and hetero-dimerizing partners that allow inducible  
84 recruitment or sequestration of proteins and visualization of membrane contact sites (MCS)  
85 between organelles. We developed two methods to allow crosslinking of RFP-tagged and  
86 GFP-tagged proteins: a dimeric nanobody, and co-expression of RFP-targeting and GFP-  
87 targeting nanobodies fused to complementary hetero-dimerizing domains. We also describe  
88 functionalized nanobodies directed to luminal sub-compartments of the secretory pathway.  
89 We demonstrate the utility of nanobody fusions by visualizing local  $\text{Ca}^{2+}$  dynamics at the  
90 surface of mitochondria, by manipulating the locations of proteins and organelles within  
91 cells, by characterizing MCS between mitochondria and the plasma membrane (PM), and by  
92 targeting luminal  $\text{Ca}^{2+}$  sensors to a sub-compartment of the endoplasmic reticulum (ER).

93 This versatile toolkit of genetically-encoded, functionalized nanobodies greatly expands  
94 the utility of RFP- and GFP-targeting nanobodies. It will provide a valuable resource for  
95 studying protein function and cell signalling in live cells. We illustrate some applications and  
96 demonstrate, for example, that  $\text{IP}_3$  receptors deliver  $\text{Ca}^{2+}$  to the outer membrane of only some

97 mitochondria and that MCS between mitochondria and the plasma membrane occur at only  
98 one or two sites on each mitochondrion.

99

## 100 **Results**

### 101 **Targeting RFP and GFP variants with genetically-encoded nanobody fusions in live** 102 **cells**

103 The RFP nanobody (RNab) and GFP nanobody (GNab) used are the previously described  
104 llama variants LaM4 and LaG16, respectively [21]. They were chosen for their favourable  
105 combinations of high affinity ( $K_d$  values of 0.18 nM and 0.69 nM, respectively) and ability to  
106 bind a variety of RFP or GFP variants [21]. The latter attribute maximizes their potential for  
107 targeting a wide variety of FPs [3, 4]. LaM4 binds both mCh and DsRed variants, but not  
108 GFPs [21]. In addition to binding GFP, LaG16 binds cyan, blue and yellow FPs (CFP, BFP  
109 and YFP), but not RFPs [21]. In contrast, the widely used VhhGFP4 nanobody binds GFP,  
110 but not CFP [22].

111 In HeLa cells with organelles (ER, mitochondria, nucleus and lysosomes) labelled with  
112 mCh or mRFP markers, expression of RNab-GFP (*Fig. 2A*) specifically identified the  
113 labelled organelle (*Fig. 2B*). Similar results were obtained with GNab-mCh (*Fig. 2C*) and  
114 organelles (ER, mitochondria and nucleus) labelled with GFP or mTurquoise (*Fig. 2D*).  
115 These results demonstrate that plasmid-encoded RNab and GNab allow specific labelling of a  
116 variety of RFP and GFP variants in live cells.

117

### 118 **Targeting sensors to RFP and GFP**

119 The effects of intracellular messengers such as  $Ca^{2+}$  [27],  $H^+$  [28] and ATP/ADP [29] can be  
120 highly localized within cells. To enable visualization of these intracellular messengers in

121 microdomains around RFP-tagged and GFP-tagged proteins, we fused RNab and GNab to  
122 fluorescent sensors for  $\text{Ca}^{2+}$  [30],  $\text{H}^+$  [31, 32] or ATP/ADP [33].

123 RNab was fused to the green fluorescent  $\text{Ca}^{2+}$  sensor G-GECO1.2 (**Fig. 3**), and GNab was  
124 fused to the red fluorescent  $\text{Ca}^{2+}$  sensors, R-GECO1.2 or LAR-GECO1.2 [30] (**Fig. 4**). The  
125 affinities of these sensors for  $\text{Ca}^{2+}$  ( $K_D^{\text{Ca}}$  of 1.2  $\mu\text{M}$  for G-GECO1.2 and R-GECO1.2, and 10  
126  $\mu\text{M}$  for LAR-GECO1.2) are low relative to global changes in the cytosolic free  $\text{Ca}^{2+}$   
127 concentration ( $[\text{Ca}^{2+}]_c$ ) after receptor stimulation (typically  $\sim 300$  nM) [34]. This facilitates  
128 selective detection of the large, local rises in  $[\text{Ca}^{2+}]$  that are important for intracellular  
129 signalling, at the contacts between active inositol 1,4,5-trisphosphate receptors ( $\text{IP}_3\text{Rs}$ ) and  
130 mitochondria, for example [27]. To allow targeted measurement of relatively low resting  
131  $[\text{Ca}^{2+}]$  within cellular microdomains we also fused RNab to the ratiometric  $\text{Ca}^{2+}$ -sensor,  
132 GEM-GECO1 ( $K_D^{\text{Ca}} = 300$  nM) [30], to give RNab-GEMGECO1 (**Additional file 1: Fig. S1**).

133 In HeLa cells expressing TOM20-mCh or TOM20-GFP to identify the outer mitochondrial  
134 membrane (OMM), the RNab- $\text{Ca}^{2+}$  sensors (**Fig. 3** and **Additional file 1: Fig. S1**) and GNab-  
135  $\text{Ca}^{2+}$  sensors (**Fig. 4**) were targeted to the OMM. Both families of targeted sensor reported an  
136 increase in  $[\text{Ca}^{2+}]$  after treatment with the  $\text{Ca}^{2+}$  ionophore, ionomycin (**Fig. 3**, **Fig. 4** and  
137 **Additional file 1: Fig. S1**). This confirms the ability of the sensors to report  $[\text{Ca}^{2+}]$  changes  
138 when targeted to the OMM microdomain.

139 In some cells, the targeted Nab- $\text{Ca}^{2+}$  sensors revealed local changes in  $[\text{Ca}^{2+}]_c$  after  
140 receptor stimulation with histamine, which stimulates  $\text{IP}_3$  formation and  $\text{Ca}^{2+}$  release from the  
141 ER in HeLa cells [34]. Imperfect targeting of the RNab-GGECO1.2 to the OMM allowed  
142  $\text{Ca}^{2+}$  signals at the surface of individual mitochondria to be distinguished from those in  
143 nearby cytosol in some cells (**Fig. 3D-F** and **Additional file 2: Video 1**). In the example  
144 shown, RNab-GGECO1.2 at both the OMM and nearby cytosol responded to the large, global  
145 increases in  $[\text{Ca}^{2+}]$  evoked by ionomycin. However, cytosolic RNab-GGECO1.2 did not

146 respond to histamine, while the sensor at the OMM responded with repetitive spiking (**Fig.**  
147 **3D-F** and **Additional file 2: Video 1**). The GNab-LARGECO1.2 sensor, which has the lowest  
148 affinity for  $\text{Ca}^{2+}$  of the sensors used, revealed changes in  $[\text{Ca}^{2+}]_c$  at the surface of some  
149 mitochondria, but not others in the same cell (**Fig. 4D-F**, **Fig. 4H** and **Additional file 3:**  
150 **Video 2**). In the example shown, GNab-LARGECO1.2 at the OMM in all mitochondria  
151 within the cell responded to the large, global increases in  $[\text{Ca}^{2+}]$  evoked by ionomycin.  
152 However, in response to histamine mitochondria in the perinuclear region responded, but not  
153 those in peripheral regions (**Fig. 4D-F**, **Fig. 4H** and **Additional file 3: Video 2**).  $\text{Ca}^{2+}$  uptake  
154 by mitochondria affects many cellular responses, including mitochondrial metabolism, ATP  
155 production and apoptosis [35], and  $\text{Ca}^{2+}$  at the cytosolic face of the OMM regulates  
156 mitochondrial motility [36]. The subcellular heterogeneity of mitochondrial exposure to  
157 increased  $[\text{Ca}^{2+}]$  suggests that these responses may be very localized in cells.

158 These observations align with previous reports showing that  $\text{Ca}^{2+}$ -mobilizing receptors  
159 evoke both oscillatory  $[\text{Ca}^{2+}]$  changes within the mitochondrial matrix [37], and large local  
160 increases in  $[\text{Ca}^{2+}]$  at the cytosolic face of the OMM [38]. Our results establish that  
161 nanobody- $\text{Ca}^{2+}$ -sensor fusions are functional and appropriately targeted, and can be used to  
162 detect physiological changes in  $[\text{Ca}^{2+}]$  within cellular microdomains such as the OMM.

163 For targeted measurements of intracellular pH, RNab was fused to the green fluorescent  
164 pH sensor super-ecliptic pHluorin (SEpHluorin) [31] and GNab was fused to the red  
165 fluorescent pH sensor pHuji [32]. Both Nab-pH sensors were targeted to the OMM by the  
166 appropriate fluorescent tags, where they responded to changes in intracellular pH imposed by  
167 altering extracellular pH in the presence of the  $\text{H}^+/\text{K}^+$  ionophore nigericin (**Fig. 5**).

168 For targeted measurements of ATP/ADP, RNab was fused to the excitation-ratiometric  
169 ATP/ADP sensor Perceval-HR [33]. RNab-Perceval-HR was targeted to the surface of



170 mitochondria and responded to inhibition of glycolysis and oxidative phosphorylation (*Fig.*  
171 *6*).

172 The results demonstrate that nanobodies can be used to direct sensors for  $\text{Ca}^{2+}$ ,  $\text{H}^+$  or  
173 ATP/ADP to specific subcellular compartments tagged with variants of RFP or GFP.

174

### 175 **Targeting SNAPf tags to RFP and GFP in live cells**

176 SNAP, and related tags, are versatile because a range of SNAP substrates, including some  
177 that are membrane-permeant, can be used to attach different fluorophores or cargoes to the  
178 tag [39]. Purified GFP-targeting nanobodies fused to a SNAP tag have been used to label  
179 fixed cells for optically demanding applications [40]. We extended this strategy to live cells  
180 using RNab and GNab fused to the optimized SNAPf tag [41] (*Fig. 7A* and *B*). In cells  
181 expressing the mitochondrial marker TOM20-mCh, RNab-SNAPf enabled labelling of  
182 mitochondria with the cell-permeable substrate SNAP-Cell 647-SiR and imaging at far-red  
183 wavelengths (*Fig. 7C*). In cells expressing lysosomal LAMP1-mCh and RNab-SNAPf,  
184 SNAP-Cell 647-SiR instead labelled lysosomes (*Fig. 7D*), demonstrating that SNAP-Cell  
185 647-SiR specifically labelled the organelles targeted by RNab-SNAPf. Similar targeting of  
186 SNAP-Cell 647-SiR to mitochondria (*Fig. 7E*) and lysosomes (*Fig. 7F*) was achieved by  
187 GNab-SNAPf co-expressed with the appropriate GFP-tagged organelle markers.

188 Chromophore-assisted light inactivation (CALI) can inactivate proteins or organelles by  
189 exciting fluorophores attached to them that locally generate damaging reactive superoxide.  
190 Historically, antibodies were used to direct a photosensitizer to its target, but fusion of  
191 fluorescent proteins or SNAP tags to proteins of interest is now widely used [42]. RNab-  
192 SNAPf and GNab-SNAPf make the SNAP strategy more broadly applicable to CALI  
193 applications. We demonstrate this by targeting CALI to the outer surface of lysosomes. We  
194 anticipated that CALI in this microdomain might, amongst other effects, disrupt the motility

195 of lysosomes, which depends on their association with molecular motors [43]. RNab-SNAPf  
196 enabled labelling of lysosomes with the CALI probe fluorescein, using the cell-permeable  
197 substrate, SNAP-Cell-fluorescein (**Fig. 8A and B**). Exposure to blue light then immobilized  
198 the lysosomes (**Fig. 8C-F** and **Additional file 4: Video 3**), indicating a loss of motor-driven  
199 motility. Control experiments demonstrated that labelling cytosolic SNAPf with SNAP-Cell-  
200 fluorescein (**Additional file 1: Fig. S2A and S2B**) had significantly less effect on lysosomal  
201 motility after exposure to blue light (**Fig. 8F** and **Additional file 1: Fig. S2C-E**). These  
202 results demonstrate that nanobody-SNAPf fusions allow targeting of fluorescent dyes in live  
203 cells, which can be used for re-colouring of tagged proteins or targeted CALI.

204

#### 205 **Sequestration of proteins tagged with RFP or GFP**

206 Fusion of GFP nanobodies to degrons allows proteasomal degradation of GFP-tagged  
207 proteins [24], but the method is slow and cumbersome to reverse. An alternative strategy is to  
208 sequester tagged proteins so they cannot fulfil their normal functions. We used two strategies  
209 to achieve this: artificial clustering and recruitment to mitochondria.

210 We induced artificial clustering by fusing RNab or GNab to a multimerizing protein (MP)  
211 comprising a dodecameric fragment of  $\text{Ca}^{2+}$ -calmodulin-dependent protein kinase II  
212 (CaMKII) [44], with an intervening fluorescent protein (mRFP or mCerulean) for  
213 visualization of the Nab fusion (**Fig. 9A and B**). RNab-mCerulean-MP caused clustering of  
214 the ER transmembrane protein mCh-Sec61 $\beta$  (**Fig. 9C and D**) and caused lysosomes tagged  
215 with LAMP1-mCh to aggregate into abnormally large structures (**Fig. 9E and F**). GNab-  
216 mRFP-MP had the same clustering effect on lysosomes labelled with LAMP1-GFP (**Fig. 9G**  
217 and **H**) and caused clustering of GFP-tagged proteins in the cytosol (calmodulin, **Fig. 9I** and  
218 **J**), nucleus and cytosol (p53, **Fig. 9K and L**) or ER membranes (IP<sub>3</sub>R3, **Fig. 9M and N**).

219 For inducible sequestration, sometimes known as ‘knocksideways’ [45], we used two  
220 approaches based on hetero-dimerizing modules, one chemical and one optical. First, we  
221 adapted the original knocksideways method, where proteins tagged with FKBP (FK506-  
222 binding protein) are recruited by rapamycin to proteins tagged with FRB (FKBP-rapamycin-  
223 binding domain) on the OMM, and thereby sequestered. The method has hitherto relied on  
224 individual proteins of interest being tagged with FKBP [45]. RNab-FKBP and GNab-FKBP  
225 (**Fig. 10A** and **B**) extend the method to any protein tagged with RFP or GFP. For our  
226 analyses, we expressed TOM70 (an OMM protein) linked to FRB through an intermediary  
227 fluorescent protein (GFP or mCh, to allow optical identification of the fusion protein). RNab-  
228 FKBP sequestered the ER transmembrane protein mCh-Sec61 $\beta$  at the OMM (TOM70-GFP-  
229 FRB) within seconds of adding rapamycin (**Additional file 5: Video 4**) and rapidly depleted  
230 mCh-Sec61 $\beta$  from the rest of the ER (**Fig. 10C-E**). After addition of rapamycin, GNab-  
231 FKBP rapidly sequestered endogenous IP<sub>3</sub>R1 tagged with GFP (GFP-IP<sub>3</sub>R1) [7] (**Fig. 10F**  
232 and **G**, and **Additional file 6: Video 5**) and cytosolic GFP-tagged calmodulin (**Fig. 10H** and  
233 **Additional file 7: Video 6**) at mitochondria expressing TOM70-mCh-FRB. Rapamycin  
234 caused no sequestration in the absence of the nanobody fusions (**Additional file 1: Fig. S3**).

235 To make sequestration reversible and optically activated, we adapted the light-oxygen-  
236 voltage-sensing domain (LOV2)/Zdark (zdk1) system in which light induces dissociation of  
237 LOV2-zdk1 hetero-dimers [46]. Because this system is operated by blue light at intensities  
238 lower than required for imaging GFP [46], it is most suitable for use with red fluorescent  
239 tags. RNab-zdk1 (**Fig. 11A**) sequestered cytosolic mCh on the OMM in cells expressing  
240 TOM20-LOV2, and blue laser light rapidly and reversibly redistributed mCh to the cytosol  
241 (**Fig. 11B** and **C**).

242

243

## 244 **Inducible recruitment of tagged proteins to membrane contact sites**

245 The ability of Nab-FKBP fusions to recruit membrane proteins to FRB-tagged targets  
246 suggested an additional application: revealing contact sites between membrane-bound  
247 organelles. ER-mitochondrial membrane contact sites (MCS) have been much studied [47],  
248 but contacts between the PM and mitochondria, which are less extensive [48], have received  
249 less attention. In HeLa cells co-expressing the PM  $\beta_2$ -adrenoceptor tagged with mCh ( $\beta_2$ AR-  
250 mCh), TOM20-GFP-FRB and RNab-FKBP, rapamycin caused rapid recruitment of  $\beta_2$ AR-  
251 mCh within the PM to mitochondria at discrete puncta that grew larger with time (**Fig. 12A-E**  
252 and **Additional file 8: Video 7**). Recruitment was not seen in the absence of co-expressed  
253 RNab-FKBP (**Fig. 12F**). Rapamycin also triggered similar punctate accumulation of  $\beta_2$ AR at  
254 mitochondria in COS-7 cells expressing  $\beta_2$ AR-GFP, TOM20-mCh-FRB and GNab-FKBP  
255 (**Additional file 1: Fig. S4**). In similar analyses of ER-mitochondria and PM-mitochondria  
256 MCS, the initial punctate colocalization of proteins was shown to report native MCS, which  
257 grew larger with time as rapamycin zipped the proteins together [48]. Our results are  
258 consistent with that interpretation. In most cases,  $\beta_2$ AR were recruited to only one or two  
259 discrete sites on each mitochondrion, which expanded during prolonged incubation with  
260 rapamycin, but without the appearance of new sites (**Fig. 12D and E**, and **Additional file 1:**  
261 **Fig. S4**). Rapamycin had no evident effect on recruiting new mitochondria to the PM, but it  
262 did cause accumulation of tagged TOM70 at MCS and depletion of TOM70 from the rest of  
263 each mitochondrion, indicating mobility of TOM70 within the OMM (**Additional file 1: Fig.**  
264 **S4**). Our results suggest that inducible cross-linking using RNab-FKBP or GNab-FKBP  
265 identifies native MCS between mitochondria and PM, with each mitochondrion forming only  
266 one or two MCS with the PM. We have not explored the functional consequences of these  
267 restricted MCS, but we speculate that they may identify sites where proteins involved in  
268 communication between the PM and mitochondria are concentrated, facilitating, for example,

269 phospholipid transfer [49], the generation of ATP microdomains [50], or  $\text{Ca}^{2+}$  exchanges  
270 between mitochondria and store-operated  $\text{Ca}^{2+}$  entry (SOCE) [51] or PM  $\text{Ca}^{2+}$ -ATPases [52].

271 We next tested whether PM proteins could be recruited to the MCS between ER-PM that  
272 are important for SOCE and lipid transfer [53]. In response to rapamycin, mCh-Orai1, the  
273 PM  $\text{Ca}^{2+}$  channel that mediates SOCE [54], was recruited by RNab-FKBP to ER-PM MCS  
274 labelled with the marker GFP-MAPPER-FRB [55] (*Fig. 13A and B*). Recruitment was not  
275 observed in the absence of RNab-FKBP (*Fig. 13C*). We conclude that the method identifies  
276 native ER-PM MCS during the initial phase of Nab recruitment, and the Nab subsequently  
277 exaggerates these MCS.

278 One of the least explored MCS is that between lysosomes and mitochondria [56]. Recent  
279 evidence shows that these MCS control the morphology of both organelles [57] and probably  
280 mediate exchange of cholesterol and other metabolites between them [58]. We assessed  
281 whether the nanobody fusions could be used to inducibly recruit lysosomes to mitochondria.  
282 GNab-FKBP enabled recruitment of lysosomes labelled with LAMP1-GFP to mitochondria  
283 labelled with TOM20-mCh-FRB, in response to rapamycin (*Fig. 14A-C*). Lysosomes were  
284 not recruited to mitochondria in the absence of GNab-FKBP (*Fig. 14D*).

285

### 286 **Cross-linking RFP-tagged and GFP-tagged proteins**

287 We generated a dimeric nanobody (GNab-RNab) that binds simultaneously to GFP and RFP  
288 (*Fig. 15A*), and demonstrated its utility by crosslinking a variety of GFP-tagged and RFP-  
289 tagged proteins. Cytosolic GFP, normally diffusely distributed in the cytosol (data not  
290 shown), was recruited to nuclei by H2B-mCh (*Fig. 15B*) or to mitochondria by TOM20-mCh  
291 (*Fig. 15C*). In the presence of GNab-RNab, mCh-Orai1 and endogenously tagged GFP-  
292  $\text{IP}_3\text{R1}$  formed large co-clusters (*Fig 15D*) that differed markedly from the distributions of  
293 GFP- $\text{IP}_3\text{R1}$  (*Fig. 10F*) and mCh-Orai1 (*Fig 13*) in the absence of crosslinking. Consistent

294 with earlier results (**Fig. 12** and **Additional file 1: Fig. S4**),  $\beta_2$ AR-mCh, which is normally  
295 diffusely distributed in the PM, formed mitochondria-associated puncta when crosslinked to  
296 mitochondria expressing TOM20-GFP (**Fig. 15E**). Whole organelles could also be  
297 crosslinked. Co-expression of LAMP1-GFP and LAMP1-mCh labelled small, mobile  
298 lysosomes in control cells (**Fig. 15F**), while additional co-expression of GNab-RNab caused  
299 accumulation of lysosomes into large clusters (**Fig. 15G**).

300 This crosslinking of GFP and RFP was made rapidly inducible with an RNab-FRB fusion  
301 that hetero-dimerizes with GNab-FKBP in the presence of rapamycin (**Fig. 16A**). Co-  
302 expression of GNab-FKBP with RNab-FRB in cells co-expressing TOM20-GFP and mCh-  
303 Sec61 $\beta$  led to rapid colocalization of GFP and mCh after addition of rapamycin (**Fig. 16B**  
304 and **C**, and **Additional file 9: Video 8**). Similar results were obtained with RNab-FKBP and  
305 GNab-FRB (**Additional file 1: Fig. S5**). We conclude that GNab-FKBP and RNab-FRB  
306 provide a rapidly inducible system for crosslinking any GFP-tagged protein to any RFP-  
307 tagged protein.

308

### 309 **Targeting secretory compartments with luminal nanobodies**

310 GNab and RNab were directed to the lumen of the secretory pathway by addition of an N-  
311 terminal signal sequence, giving ssGNab and ssRNab. Targeting of ssGNab-mCh to the  
312 Golgi, ER network, or ER-PM MCS was achieved by co-expression of organelle markers with  
313 luminal FP tags (**Fig. 17A and B**). In each case, there was significant colocalization of green  
314 and red proteins. Similar targeting of ssRNab-GFP to the ER network or ER-PM MCS was  
315 achieved by co-expression with mCh-tagged luminal markers of these organelles (**Fig. 17C**  
316 and **D**). These results demonstrate that ssGNab and ssRNab fusions can be directed to the  
317 lumen of specific compartments of the secretory pathway.

318       Fluorescent Ca<sup>2+</sup> sensors targeted to the lumen of the entire ER [59, 60] are widely used  
319       and have considerably advanced our understanding of Ca<sup>2+</sup> signalling [61, 62]. Fluorescent  
320       Ca<sup>2+</sup> sensors targeted to ER sub-compartments and the secretory pathway have received less  
321       attention but have, for example, been described for the Golgi [63, 64]. Our nanobody  
322       methods suggest a generic approach for selective targeting of luminal Ca<sup>2+</sup> indicators. Fusion  
323       of ssRNab to GCEPIA1 or GEM-CEPIA [60] provided ssRNab-GCEPIA1 and ssRNab-  
324       GEMCEPIA (*Fig. 18A*). These fusions were targeted to the luminal aspect of ER-PM  
325       junctions by co-expression with mCh-MAPPER [7] (*Fig. 18C and D*). Fusion of ssGNab to  
326       the low-affinity Ca<sup>2+</sup> sensors LAR-GECO1 [59] or RCEPIA1 [60] provided ssGNab-  
327       LARGECO1 and ssGNab-RCEPIA1 (*Fig. 18B*). These fusions allowed targeting to ER-PM  
328       junctions labelled with GFP-MAPPER (*Fig. 18E and F*). The targeted Ca<sup>2+</sup> sensors  
329       responded appropriately to emptying of intracellular Ca<sup>2+</sup> stores by addition of ionomycin in  
330       Ca<sup>2+</sup>-free medium (*Fig. 18G-K*). These results confirm that Ca<sup>2+</sup> sensors targeted to a  
331       physiologically important ER sub-compartment, the ER-PM junctions where SOCE occurs,  
332       report changes in luminal [Ca<sup>2+</sup>]. Our results demonstrate that nanobody fusions can be  
333       targeted to luminal sub-compartments of the secretory pathway and they can report [Ca<sup>2+</sup>]  
334       within physiologically important components of the ER.

335

## 336       **Discussion**

337       The spatial organization of the cell interior influences all cellular activities and it is a  
338       recurrent theme in intracellular signalling [65, 66]. Hence, tools that can visualize and  
339       manipulate the spatial organization of intracellular components are likely to find widespread  
340       application. We introduce a toolkit of plasmids encoding functionalized nanobodies against  
341       common FP tags, including CFP, GFP, YFP and RFPs (*Fig. 1*). Use of this toolkit is  
342       supported by genome-wide collections of plasmids, cells and organisms expressing proteins

343 tagged with GFP and RFP [10-17, 19], and by facile methods for heterologous expression of  
344 tagged proteins or editing of endogenous genes to encode FP tags [5, 6]. The functionalized  
345 nanobodies provide new approaches to studying intracellular signalling in live cells.

346 Our toolkit expands the repertoire of functionalized RFP-binding nanobodies, which are  
347 less developed than their GFP-binding counterparts [67]. The RNab fusions provide new  
348 opportunities to use RFP, which often has advantages over GFP. For example, RFP is  
349 spectrally independent from blue-green sensors, which are usually superior to their red  
350 counterparts [30, 32]; from the CALI probe, fluorescein; and from optogenetic modules,  
351 which are often operated by blue-green light [68].

352 Nanobody-sensor fusions allow targeting of sensors to specific proteins and organelles  
353 (*Figs. 2-6*), and will aid visualization of signalling within cellular microdomains. Fusion of  
354 nanobodies to the  $\text{Ca}^{2+}$  sensors G-GECO1.2, R-GECO1.2 and LAR-GECO1.2 [30] (*Figs. 3*  
355 and *4*), which have relatively low affinities for  $\text{Ca}^{2+}$  ( $K_D$  values of 1.2  $\mu\text{M}$ , 1.2  $\mu\text{M}$  and 10  
356  $\mu\text{M}$ , respectively), should facilitate selective detection of the relatively large, local rises in  
357  $[\text{Ca}^{2+}]_c$  that are important for cell signalling [27]. The GEM-GECO  $\text{Ca}^{2+}$  sensor [30],  $\text{H}^+$   
358 sensors [31, 32] and ATP/ADP sensors [33] used for nanobody fusions are poised to detect  
359 fluctuations of their ligands around resting concentrations in the cell (*Figs. 4-6*).

360 Relative to direct fusions of sensors to proteins of interest, nanobody-sensor fusions have  
361 several advantages. Firstly, the generic nanobody toolkit (*Fig. 1*) can be combined with  
362 collections of FP-tagged proteins to provide many combinations; each would otherwise  
363 require expression of a unique construct. Secondly, each sensor is attached to the same entity  
364 (nanobody), which binds to the same partner (FP). Since the biophysical and biochemical  
365 properties of sensors may be influenced by their fusion partners, this provides greater  
366 confidence that sensors dispatched to different locations will respond similarly to their  
367 analyte.



368 Nanobodies allow re-colouring of FPs. Nanobody-SNAPf fusions, for example, can be  
369 used to attach fluorescent dyes, including CALI probes and far-red fluorophores, to FP tags  
370 (*Figs. 7 and 8*). Longer excitation wavelengths cause less phototoxicity and allow greater  
371 penetration through tissue, which may be useful in studies of transgenic organisms and  
372 tissues. We also envisage live-cell applications in pulse-chase analyses and using super-  
373 resolution microscopy, Förster resonance energy transfer (FRET) and fluorescence lifetime  
374 imaging.

375 Membrane-permeant forms of the SNAP ligand, O<sup>6</sup>-benzylguanine, are available  
376 conjugated to conventional Ca<sup>2+</sup> indicators (Fura-2FF, Indo-1 and BOCA-1), which are  
377 brighter than genetically-encoded indicators [69-71]; to derivatives of the two-photon  
378 fluorophore naphthalimide [72]; to the hydrogen peroxide sensor  
379 nitrobenzoylcarbonylfluorescein [73]; and to reversible chemical dimerizers [74, 75].  
380 Nanobody-SNAPf fusions will allow facile targeting of these modules to any protein or  
381 organelle tagged with RFP or GFP.

382 Cross-linking methods have many applications in cell biology, including stabilizing  
383 protein interactions (eg, for pull-downs), identifying and manipulating MCS, enforcing  
384 protein interactions (eg, receptor dimerization), redirecting proteins to different subcellular  
385 locations (eg, knocksideways) and many more. Functionalized nanobodies provide many  
386 additional opportunities to regulate protein associations. The nanobody-FKBP/FRB fusions,  
387 for example, allow rapid rapamycin-mediated crosslinking of any pair of proteins tagged with  
388 GFP/RFP, or tagged with either FP and any of the many proteins already tagged with FKBP  
389 or FRB [76] (*Figs. 10 and 12-16*). Nanobody-FKBP fusions may allow crosslinking to  
390 SNAP-tagged proteins [75], and the nanobody-SNAPf fusions to HaloTag-tagged proteins  
391 [74] and FKBP-tagged proteins [75]. RNab-zdk1 fusions allow photo-inducible crosslinking  
392 of RFP-tagged proteins to LOV-tagged proteins [46] (*Fig. 11*). Nanobodies that crosslink

393 GFP-tagged proteins to RFP-tagged proteins (GNab-RNab; and the GNab-FKBP/RNab-FRB  
394 and GNab-FRB/RNab-FKBP pairings) may have the most applications, as they can take  
395 fullest advantage of the numerous combinations of existing RFP and GFP-tagged proteins  
396 (*Figs. 15 and 16*).

397 Functionalized nanobodies directed to luminal compartments of the secretory pathway  
398 would provide useful tools, but they are under-developed. Their potential is shown by  
399 nanobodies retained within the ER, which restrict onward trafficking of target proteins and  
400 inhibit their function [77]. We show that functionalized nanobodies, including nanobody-Ca<sup>2+</sup>  
401 sensors, can be directed to sub-compartments of the secretory pathway (*Figs. 17 and 18*).  
402 Luminal Ca<sup>2+</sup> provides a reservoir within the ER, Golgi and lysosomes that can be released  
403 by physiological stimuli to generate cytosolic Ca<sup>2+</sup> signals [78, 79]. Compartmentalization of  
404 Ca<sup>2+</sup> stores within the ER [63] and Golgi [79] adds to the complexity of luminal Ca<sup>2+</sup>  
405 distribution in cells. Furthermore, luminal Ca<sup>2+</sup> itself regulates diverse aspects of cell  
406 biology, including SOCE [54], sorting of cargo in the Golgi [80], binding of ERGIC-53 to  
407 cargoes within the ER-Golgi intermediate compartment (ERGIC) [81], and exocytosis of  
408 neurotransmitters by secretory vesicles [82, 83]. Hence, there is a need for tools that can  
409 effectively report luminal [Ca<sup>2+</sup>] within this complex luminal environment. The luminal  
410 nanobody-Ca<sup>2+</sup> sensors detected changes in luminal [Ca<sup>2+</sup>] at the ER-PM MCS where SOCE  
411 occurs (*Fig. 18*).

412 In addition to nanobodies, other protein-based binders, including single-domain  
413 antibodies, designed ankyrin-repeat proteins (DARPINs), affimers, anticalins, affibodies and  
414 monobodies have been developed to recognise many important intracellular proteins [2, 84-  
415 86]. These binding proteins can be easily transplanted into the fusion scaffolds described to  
416 maximize their exploitation.

417

## 418 **Conclusions**

419 We present a toolkit of plasmids encoding functionalized nanobodies directed against  
420 common fluorescent protein tags, which will allow a wide range of applications and new  
421 approaches to studying intracellular signalling in live cells. We illustrate some applications  
422 and demonstrate, for example, that IP<sub>3</sub> receptors deliver Ca<sup>2+</sup> to the OMM of only some  
423 mitochondria, and that MCS between mitochondria and the plasma membrane occur at only  
424 one or two sites on each mitochondrion.

425

## 426 **Materials and Methods**

427

### 428 **Materials**

429 Human fibronectin was from Merck Millipore. Ionomycin was from Apollo Scientific  
430 (Stockport, UK). Rapamycin was from Cambridge Bioscience (Cambridge, UK). SNAP  
431 substrates were from New England Biolabs (Hitchin, UK). Other reagents, including  
432 histamine and nigericin, were from Sigma-Aldrich.

433

### 434 **Plasmids**

435 Sources of plasmids encoding the following proteins were: mCherry-C1 (Clontech  
436 #632524); GFP-ERcyt, mCherry-ERcyt and mTurquoise2-ERcyt (GFP, mCherry or  
437 mTurquoise2 targeted to the cytosolic side of the ER membrane via the ER-targeting  
438 sequence of the yeast UBC6 protein) [87]; mCherry-ERlumen (Addgene #55041, provided  
439 by Michael Davidson); LAMP1-mCherry [88]; TPC2-mRFP [89]; TOM20-mCherry  
440 (Addgene #55146, provided by Michael Davidson); CIB1-mRFP-MP (Addgene #58367)  
441 [44]; CIB1-mCerulean-MP (Addgene #58366) [44]; H2B-GFP (Addgene #11680) [90];  
442 TOM20-LOV2 (Addgene #81009) [46]; mCherry-Sec61β [91]; GFP-MAPPER [55]; GFP-

443 CaM (Addgene #47602, provided by Emanuel Strehler); TOM70-mCherry-FRB (pMito-  
444 mCherry-FRB, Addgene #59352) [92]; pmTurquoise2-Golgi (Addgene #36205) [93];  
445 pTriEx-mCherry-zdk1 (Addgene #81057) [46]; pTriEx-NTOM20-LOV2 (Addgene  
446 #81009) [46];  $\beta_2$ AR-mCFP (Addgene #38260) [94]; pCMV-G-CEPIA1er (Addgene  
447 #58215) [60]; pCMV-R-CEPIA1er (Addgene #58216) [60]; pCIS-GEM-CEPIA1er  
448 (Addgene #58217) [60]; CMV-ER-LAR-GECO1 and CMV-mito-LAR-GECO1.2 [59];  
449 mCherry-MAPPER and mCherry-Orai1 [7].

450 H2B-mCh was made by transferring H2B from H2B-GFP to pmCherry-N1 (Clontech)  
451 using *KpnI/BamHI*. LAMP1-GFP was made by transferring LAMP1 from LAMP1-  
452 mCherry into pEGFP-N1 (Clontech) using *EcoRI/BamHI*.  $\beta_2$ AR-mCherry was made by  
453 transferring  $\beta_2$ AR from  $\beta_2$ AR-mCFP to pmCherry-N1 (Clontech) using *NheI/XhoI*.  $\beta_2$ AR-  
454 GFP was made by transferring GFP from pEGFP-N1 (Clontech) into  $\beta_2$ AR-mCherry using  
455 *XhoI/NotI*. The mCherry-Golgi plasmid was made by transferring mCherry from  
456 pmCherry-N1 into pEYFP-Golgi (Clontech) using *AgeI/NotI*. GFP-Golgi was made by  
457 transferring GFP from pEGFP-N1 (Clontech) into Golgi-mCherry using *AgeI/NotI*.  
458 TOM20-GFP was made by transferring EGFP from pEGFP-N1 into TOM20-mCherry  
459 using *BamHI/NotI*. TOM70-GFP-FRB was made by insertion of EGFP from pEGFP-N1 into  
460 TOM70-mCh-FRB using *AgeI/BsrGI*. SNAPf-pcDNA3.1(+) was made by transferring  
461 SNAPf from pSNAPf (New England Biolabs) to pcDNA3.1 (+) using *NheI/NotI*.

462 DNA constructs encoding GNab and RNab were synthesized as DNA Strings  
463 (ThermoFisher) and introduced by Gibson assembly (Gibson Assembly Master Mix, New  
464 England Biolabs) into pcDNA3.1(+) digested with *BamHI/EcoRI*. Sequences encoding  
465 GNab and RNab are shown in **Additional file 1: Fig. S6**. Plasmids encoding nanobody  
466 fusion constructs (**Fig. 1**) were constructed from the GNab and RNab plasmids using PCR,

467 restriction digestion and ligation, or synthetic DNA Strings and Gibson assembly, and  
468 their sequences were confirmed.

469 RNab-mCerulean-MP was made by PCR of RNab using forward  
470 (ATGCTAGCAAGCTTGCCACCATGGCTC) and reverse  
471 (ATACCGGTGAGGATCCAGAGCCTCCGC) primers, followed by insertion into CIB1-  
472 mCerulean-MP using *NheI/AgeI*. GNab-mRFP-MP was made by PCR of GNab-FKBP with  
473 forward (TAGCTAGCGCCACCATGGCTCAGGTG) and reverse  
474 (CGACCGGTACGGACACGGTCACTTGGG) primers, and insertion into CIB1-mRFP1-  
475 MP using *NheI/AgeI*. RNab-mCerulean-MP was made by PCR of RNab-pcDNA3.1 (+) using  
476 forward (ATGCTAGCAAGCTTGCCACCATGGCTC) and reverse  
477 (GCGGAGGCTCTGGATCCTCACCGGTAT) primers, followed by transfer into CIB1-  
478 mCerulean-MP using *NheI/AgeI*. GNab-SNAPf and RNab-SNAPf were made by PCR of  
479 GNab-pcDNA3.1(+) and RNab-pcDNA3.1(+) using forward  
480 (CAGCTAGCTTGGTACCGAGCTCAAGCTTGC) and reverse  
481 (ATGAATTCAGATCCCCCTCCGCCAC) primers, followed by insertion into SNAPf-  
482 pcDNA3.1 (+) using *NheI/EcoRI*.

483 ss-GNab-mCherry was made by inserting mCherry from GNab-mCherry into ss-GNab-  
484 FKBP using *BamHI/NotI*. ss-RNab-GFP was made by inserting GFP from RNab-GFP into  
485 ss-RNab-pcDNA3.1(+) using *BamHI/NotI*. ss-GNab-RCEPIA was made by transferring  
486 RCEPIA from pCMV-R-CEPIA1er to ss-RNab-pcDNA3.1(+) using *BamHI/NotI*. ss-RNab-  
487 GCEPIA was made by transferring GCEPIA from pCMV-G-CEPIA1er to ss-RNab-  
488 pcDNA3.1(+) using *BamHI/NotI*. ss-RNab-GEMCEPIA was made by transferring GEM-  
489 CEPIA from pCIS-GEM-CEPIA1er to ss-RNab-pcDNA3.1(+) using *BamHI/NotI*.

490

491

## 492 **Cell culture and transient transfection**

493 HeLa and COS-7 cells (American Type Culture Collection) were cultured in Dulbecco's  
494 modified Eagle's medium/F-12 with GlutaMAX (ThermoFisher) supplemented with foetal  
495 bovine serum (FBS, 10%, Sigma). Cells were maintained at 37°C in humidified air with  
496 5% CO<sub>2</sub>, and passaged every 3-4 days using Gibco TrypLE Express (ThermoFisher). For  
497 imaging, cells were grown on 35-mm glass-bottomed dishes (#P35G-1.0-14-C, MatTek)  
498 coated with human fibronectin (10 µg ml<sup>-1</sup>). Cells were transfected, according to the  
499 manufacturer's instructions, using TransIT-LT1 (GeneFlow) (1 µg DNA per 2.5 µl  
500 reagent). Short tandem repeat profiling (Eurofins, Germany) was used to authenticate the  
501 identity of HeLa cells [7]. Screening confirmed that all cells were free of mycoplasma  
502 infection.

503

## 504 **Fluorescence microscopy and analysis**

505 Cells were washed prior to imaging at 20°C in HEPES-buffered saline (HBS: NaCl 135  
506 mM, KCl 5.9 mM, MgCl<sub>2</sub> 1.2 mM, CaCl<sub>2</sub> 1.5 mM, HEPES 11.6 mM, D-glucose 11.5 mM,  
507 pH 7.3). Ca<sup>2+</sup>-free HBS lacked CaCl<sub>2</sub> and contained EGTA (1 mM). For manipulations of  
508 intracellular pH, cells were imaged in modified HBS (MHBS: KCl 140 mM, MgCl<sub>2</sub> 1.2  
509 mM, CaCl<sub>2</sub> 1.5 mM, HEPES 11.6 mM, D-glucose 11.5 mM, pH 7.2). The H<sup>+</sup>/K<sup>+</sup> ionophore  
510 nigericin (10 µM) was added 5 min before imaging to equilibrate intracellular and  
511 extracellular pH, and the extracellular pH was then varied during imaging by exchanging  
512 the MHBS (pH 6.5 or pH 8).

513 Fluorescence microscopy was performed at 20°C as described previously [7] using an  
514 inverted Olympus IX83 microscope equipped with a 100× oil-immersion TIRF objective  
515 (numerical aperture, NA 1.49), a multi-line laser bank (425, 488, 561 and 647 nm) and an  
516 iLas2 targeted laser illumination system (Cairn, Faversham, Kent, UK). Excitation light

517 was transmitted through either a quad dichroic beam splitter (TRF89902-QUAD) or a  
518 dichroic mirror (for 425 nm; ZT442rdc-UF2) (Chroma). Emitted light was passed through  
519 appropriate filters (Cairn Optospin; peak/bandwidth: 480/40, 525/50, 630/75 and  
520 700/75 nm) and detected with an iXon Ultra 897 electron multiplied charge-coupled device  
521 (EMCCD) camera (512 × 512 pixels, Andor). For TIRFM, the penetration depth was  
522 100 nm. The iLas2 illumination system was used for TIRFM and wide-field imaging. For  
523 experiments with RNab-PercevalHR, a 150× oil-immersion TIRF objective (NA 1.45) and  
524 a Prime 95B Scientific metal-oxide-semiconductor (CMOS) camera (512 × 512 pixels,  
525 Photometrics) were used.

526 For CALI and LOV2/zdk1 experiments, the 488-nm laser in the upright position  
527 delivered an output at the objective of 2.45 mW (PM100A power meter, Thor Labs,  
528 Newton, NJ, USA). For CALI, a single flash of 488-nm laser illumination (3-s duration)  
529 was applied, with 10-ms exposures to 488-nm laser immediately before and after the CALI  
530 flash to allow imaging of SNAP-Cell-fluorescein (i.e. 3.02 s total CALI flash). For  
531 LOV2/zdk1 experiments, repeated flashes of 488-nm light (1-s duration each) were used at  
532 2-s intervals to allow imaging with 561-nm laser illumination during the intervening  
533 periods.

534 Before analysis, all fluorescence images were corrected for background by subtraction  
535 of fluorescence detected from a region outside the cell. Image capture and processing used  
536 MetaMorph Microscopy Automation and Image Analysis Software (Molecular Devices)  
537 and Fiji [95]. Particle tracking used the TrackMate ImageJ plugin [96], with an estimated  
538 blob diameter of 17 pixels and a threshold of 5 pixels. Co-localization analysis used the  
539 JACoP ImageJ plugin [97]. Pearson's correlation coefficient ( $r$ ) was used to quantify  
540 colocalization. We report  $r$  values only when the Costes' randomization-based colocalization  
541 value (P-value = 100 after 100 iterations) confirmed the significance of the original

542 colocalization. Where example images are shown, they are representative of at least three  
543 independent experiments (individual plates of cells from different transfections and days).

544

#### 545 **Statistics**

546 Results are presented as mean  $\pm$  SEM for particle-tracking analyses and mean  $\pm$  SD for  
547 colocalization analyses, from  $n$  independent analyses (individual plates of cells from  
548 different transfections). Statistical comparisons used paired or unpaired Student's  $t$ -tests,  
549 or analysis of variance with the Bonferroni correction used for multiple comparisons. \*  $p <$   
550 0.05 was considered significant.

551

#### 552 **Availability of data and materials**

553 All plasmids and data generated or analysed in this study are available from the  
554 corresponding author on reasonable request.

555

#### 556 **Competing interests**

557 The authors confirm that they have no competing interests.

558

#### 559 **Funding**

560 This work was supported by the Biotechnology and Biological Sciences Research Council  
561 UK (grant number BB/P005330/1) and a Wellcome Trust Senior Investigator Award (grant  
562 number 101844).

563



564 **Authors' contributions**

565 DLP and CWT conceived the work. DLP conducted all experiments and analysis. DLP and  
566 CWT interpreted data and wrote the manuscript. DLP and CWT approved the final  
567 manuscript.

568

569 **Acknowledgements**

570 Not applicable.

571

572 **References**

- 573 1. Clift D, McEwan WA, Labzin LI, Konieczny V, Mogessie B, James LC, et al. A  
574 method for the acute and rapid degradation of endogenous proteins. *Cell*.  
575 2018;171:1692-706.e18.
- 576 2. Helma J, Cardoso MC, Muyldermans S, Leonhardt H. Nanobodies and recombinant  
577 binders in cell biology. *J Cell Biol*. 2015;209:633-44.
- 578 3. Shaner NC, Steinbach PA, Tsien RY. A guide to choosing fluorescent proteins. *Nat*  
579 *Methods*. 2005;2:905-9.
- 580 4. Rodriguez EA, Campbell RE, Lin JY, Lin MZ, Miyawaki A, Palmer AE, et al. The  
581 growing and glowing toolbox of fluorescent and photoactive proteins. *Trends Biochem*  
582 *Sci*. 2017;42:111-29.
- 583 5. Leonetti MD, Sekine S, Kamiyama D, Weissman JS, Huang B. A scalable strategy for  
584 high-throughput GFP tagging of endogenous human proteins. *Proc Natl Acad Sci USA*.  
585 2016;113:E3501-E8.
- 586 6. Stewart-Ornstein J, Lahav G. Dynamics of CDKN1A in single cells defined by an  
587 endogenous fluorescent tagging toolkit. *Cell Rep*. 2016;14:1800-11.

- 588 7. Thillaiappan NB, Chavda AP, Tovey SC, Prole DL, Taylor CW.  $\text{Ca}^{2+}$  signals initiate at  
589 immobile  $\text{IP}_3$  receptors adjacent to ER-plasma membrane junctions. *Nat Commun.*  
590 2017;8:1505.
- 591 8. Zhang J. The colorful journey of green fluorescent protein. *ACS Chem Biol.* 2009;4:85-  
592 8.
- 593 9. Stadler C, Rexhepaj E, Singan VR, Murphy RF, Pepperkok R, Uhlen M, et al.  
594 Immunofluorescence and fluorescent-protein tagging show high correlation for protein  
595 localization in mammalian cells. *Nat Methods.* 2013;10:315-23.
- 596 10. Hein MY, Hubner NC, Poser I, Cox J, Nagaraj N, Toyoda Y, et al. A human  
597 interactome in three quantitative dimensions organized by stoichiometries and  
598 abundances. *Cell.* 2015;163:712-23.
- 599 11. Nagarkar-Jaiswal S, Lee PT, Campbell ME, Chen K, Anguiano-Zarate S, Gutierrez  
600 MC, et al. A library of MiMICs allows tagging of genes and reversible, spatial and  
601 temporal knockdown of proteins in *Drosophila*. *eLife.* 2015;4:e05338.
- 602 12. Huh WK, Falvo JV, Gerke LC, Carroll AS, Howson RW, Weissman JS, et al. Global  
603 analysis of protein localization in budding yeast. *Nature.* 2003;425:686-91.
- 604 13. Hayashi A, Ding DQ, Tsutsumi C, Chikashige Y, Masuda H, Haraguchi T, et al.  
605 Localization of gene products using a chromosomally tagged GFP-fusion library in the  
606 fission yeast *Schizosaccharomyces pombe*. *Genes Cells.* 2009;14:217-25.
- 607 14. Yofe I, Weill U, Meurer M, Chuartzman S, Zalckvar E, Goldman O, et al. One library  
608 to make them all: streamlining the creation of yeast libraries via a SWAp-Tag strategy.  
609 *Nat Methods.* 2016;13:371-8.
- 610 15. Koroleva OA, Tomlinson ML, Leader D, Shaw P, Doonan JH. High-throughput protein  
611 localization in *Arabidopsis* using *Agrobacterium*-mediated transient expression of GFP-  
612 ORF fusions. *Plant J.* 2005;41:162-74.

- 613 16. Tian GW, Mohanty A, Chary SN, Li S, Paap B, Drakakaki G, et al. High-throughput  
614 fluorescent tagging of full-length *Arabidopsis* gene products in planta. *Plant Physiol.*  
615 2004;135:25-38.
- 616 17. Kitagawa M, Ara T, Arifuzzaman M, Ioka-Nakamichi T, Inamoto E, Toyonaga H, et al.  
617 Complete set of ORF clones of Escherichia coli ASKA library (a complete set of E. coli  
618 K-12 ORF archive): unique resources for biological research. *DNA Res.* 2005;12:291-  
619 9.
- 620 18. Eason MG, Damry AM, Chica RA. Structure-guided rational design of red fluorescent  
621 proteins: towards designer genetically-encoded fluorophores. *Curr Opin Struct Biol.*  
622 2017;45:91-9.
- 623 19. Harikumar A, Edupuganti RR, Sorek M, Azad GK, Markoulaki S, Sehnalova P, et al.  
624 An endogenously tagged fluorescent fusion protein library in mouse embryonic stem  
625 cells. *Stem Cell Rep.* 2017;9:1304-14.
- 626 20. Pollithy A, Romer T, Lang C, Muller FD, Helma J, Leonhardt H, et al. Magnetosome  
627 expression of functional camelid antibody fragments (nanobodies) in *Magnetospirillum*  
628 *gryphiswaldense*. *Appl Environ Microbiol.* 2011;77:6165-71.
- 629 21. Fridy PC, Li Y, Keegan S, Thompson MK, Nudelman I, Scheid JF, et al. A robust  
630 pipeline for rapid production of versatile nanobody repertoires. *Nat Methods.*  
631 2014;11:1253-60.
- 632 22. Rothbauer U, Zolghadr K, Muyldermans S, Schepers A, Cardoso MC, Leonhardt H. A  
633 versatile nanotrapp for biochemical and functional studies with fluorescent fusion  
634 proteins. *Mol Cell Proteomics.* 2008;7:282-9.
- 635 23. Kanner SA, Morgenstern T, Colecraft HM. Sculpting ion channel functional expression  
636 with engineered ubiquitin ligases. *eLife.* 2017;6:e29744.

- 637 24. Caussin E, Kanca O, Affolter M. Fluorescent fusion protein knockout mediated by  
638 anti-GFP nanobody. *Nat Struct Mol Biol.* 2011;19:117-21.
- 639 25. Borg S, Popp F, Hofmann J, Leonhardt H, Rothbauer U, Schuler D. An intracellular  
640 nanotrap redirects proteins and organelles in live bacteria. *MBio.* 2015;6:e02117.
- 641 26. Liu TK, Hsieh PY, Zhuang YD, Hsia CY, Huang CL, Lai HP, et al. A rapid SNAP-tag  
642 fluorogenic probe based on an environment-sensitive fluorophore for no-wash live cell  
643 imaging. *ACS Chem Biol.* 2014;9:2359-65.
- 644 27. Filadi R, Pozzan T. Generation and functions of second messengers microdomains. *Cell*  
645 *Calcium.* 2015;58:405-14.
- 646 28. Ludwig FT, Schwab A, Stock C. The Na<sup>+</sup> /H<sup>+</sup> -exchanger (NHE1) generates pH  
647 nanodomains at focal adhesions. *J Cell Physiol.* 2012;228:1351-8.
- 648 29. Schlattner U, Klaus A, Ramirez Rios S, Guzun R, Kay L, Tokarska-Schlattner M.  
649 Cellular compartmentation of energy metabolism: creatine kinase microcompartments  
650 and recruitment of B-type creatine kinase to specific subcellular sites. *Amino Acids.*  
651 2016;48:1751-74.
- 652 30. Zhao Y, Araki S, Wu J, Teramoto T, Chang YF, Nakano M, et al. An expanded palette  
653 of genetically encoded Ca<sup>2+</sup> indicators. *Science.* 2011;333:1888-91.
- 654 31. Sankaranarayanan S, De Angelis D, Rothman JE, Ryan TA. The use of pHluorins for  
655 optical measurements of presynaptic activity. *Biophys J.* 2000;79:2199-208.
- 656 32. Shen Y, Rosendale M, Campbell RE, Perrais D. pHuji, a pH-sensitive red fluorescent  
657 protein for imaging of exo- and endocytosis. *J Cell Biol.* 2014;207:419-32.
- 658 33. Tantama M, Martinez-Francois JR, Mongeon R, Yellen G. Imaging energy status in  
659 live cells with a fluorescent biosensor of the intracellular ATP-to-ADP ratio. *Nat*  
660 *Commun.* 2013;4:2550.

- 661 34. Atakpa P, Thillaiappan NB, Mataragka S, Prole DL, Taylor CW. IP<sub>3</sub> receptors  
662 preferentially associate with ER-lysosome contact sites and selectively deliver Ca<sup>2+</sup> to  
663 lysosomes. *Cell Rep.* 2018;25:3180-93.
- 664 35. Mammucari C, Raffaello A, Vecellio Reane D, Gherardi G, De Mario A, Rizzuto R.  
665 Mitochondrial calcium uptake in organ physiology: from molecular mechanism to  
666 animal models. *Pflugers Archive.* 2018;470:1165-79.
- 667 36. Wang X, Schwarz TL. The mechanism of Ca<sup>2+</sup> -dependent regulation of kinesin-  
668 mediated mitochondrial motility. *Cell.* 2009;136:163-74.
- 669 37. Hajnóczky G, Robb-Gaspers LD, Seitz MB, Thomas AP. Decoding cytosolic calcium  
670 oscillations in the mitochondria. *Cell.* 1995;82:415-24.
- 671 38. Giacomello M, Drago I, Bortolozzi M, Scorzeto M, Gianelle A, Pizzo P, et al. Ca<sup>2+</sup> hot  
672 spots on the mitochondrial surface are generated by Ca<sup>2+</sup> mobilization from stores, but  
673 not by activation of store-operated Ca<sup>2+</sup> channels. *Mol Cell.* 2010;38:280-90.
- 674 39. Cole NB. Site-specific protein labeling with SNAP-tags. *Curr Prot Prot Sci.*  
675 2014;73:Unit 30.1.
- 676 40. Ries J, Kaplan C, Platonova E, Eghlidi H, Ewers H. A simple, versatile method for  
677 GFP-based super-resolution microscopy via nanobodies. *Nat Methods.* 2012;9:582-4.
- 678 41. Bodor DL, Rodriguez MG, Moreno N, Jansen LE. Analysis of protein turnover by  
679 quantitative SNAP-based pulse-chase imaging. *Curr Prot Cell Biol.* 2012:Unit 8.
- 680 42. Sano Y, Watanabe W, Matsunaga S. Chromophore-assisted laser inactivation - towards  
681 a spatiotemporal-functional analysis of proteins, and the ablation of chromatin,  
682 organelle and cell function. *J Cell Sci.* 2014;127:1621-9.
- 683 43. Bonifacino JS, Neefjes J. Moving and positioning the endolysosomal system. *Curr*  
684 *Opin Cell Biol.* 2017;47:1-8.

- 685 44. Lee S, Park H, Kyung T, Kim NY, Kim S, Kim J, et al. Reversible protein inactivation  
686 by optogenetic trapping in cells. *Nat Methods*. 2014;11:633-6.
- 687 45. Robinson MS, Sahlender DA, Foster SD. Rapid inactivation of proteins by rapamycin-  
688 induced rerouting to mitochondria. *Dev Cell*. 2010;18:324-31.
- 689 46. Wang H, Vilela M, Winkler A, Tarnawski M, Schlichting I, Yumerefendi H, et al.  
690 LOVTRAP: an optogenetic system for photoinduced protein dissociation. *Nat Methods*.  
691 2016;13:755-8.
- 692 47. Csordas G, Weaver D, Hajnoczky G. Endoplasmic reticular-mitochondrial  
693 contactology: structure and signaling functions. *Trends Cell Biol*. 2018;28:523-40.
- 694 48. Csordas G, Varnai P, Golenar T, Roy S, Purkins G, Schneider TG, et al. Imaging  
695 interorganelle contacts and local calcium dynamics at the ER-mitochondrial interface.  
696 *Mol Cell*. 2010;39:121-32.
- 697 49. Tepikin AV. Mitochondrial junctions with cellular organelles: Ca<sup>2+</sup> signalling  
698 perspective. *Pflugers Archive*. 2018;470:1181-92.
- 699 50. Kennedy HJ, Pouli AE, Ainscow EK, Jouaville LS, Rizzuto R, Rutter GA. Glucose  
700 generates sub-plasma membrane ATP microdomains in single islet beta-cells. Potential  
701 role for strategically located mitochondria. *J Biol Chem*. 1999;274:13281-91.
- 702 51. Quintana A, Pasche M, Junker C, Al-Ansary D, Rieger H, Kummerow C, et al. Calcium  
703 microdomains at the immunological synapse: how ORAI channels, mitochondria and  
704 calcium pumps generate local calcium signals for efficient T-cell activation. *EMBO J*.  
705 2011;30:3895-912.
- 706 52. Frieden M, Arnaudeau S, Castelbou C, Demaurex N. Subplasmalemmal mitochondria  
707 modulate the activity of plasma membrane Ca<sup>2+</sup>-ATPases. *J Biol Chem*.  
708 2005;280:43198-208.

- 709 53. Balla T.  $\text{Ca}^{2+}$  and lipid signals hold hands at endoplasmic reticulum-plasma membrane  
710 contact sites. *J Physiol.* 2017;596:2709-16.
- 711 54. Prakriya M, Lewis RS. Store-operated calcium channels. *Physiol Rev.* 2015;95:1383-  
712 436.
- 713 55. Chang CL, Hsieh TS, Yang TT, Rothberg KG, Azizoglu DB, Volk E, et al. Feedback  
714 regulation of receptor-induced  $\text{Ca}^{2+}$  signaling mediated by E-Syt1 and Nir2 at  
715 endoplasmic reticulum-plasma membrane junctions. *Cell Rep.* 2013;5:813-25.
- 716 56. Simmen T, Tagaya M. Organelle communication at membrane contact sites (MCS):  
717 from curiosity to center stage in cell biology and biomedical research. *Adv Exp Med*  
718 *Biol.* 2017;997:1-12.
- 719 57. Wong YC, Ysselstein D, Krainc D. Mitochondria-lysosome contacts regulate  
720 mitochondrial fission via RAB7 GTP hydrolysis. *Nature.* 2017;554:382-6.
- 721 58. Torres S, Balboa E, Zanlungo S, Enrich C, Garcia-Ruiz C, Fernandez-Checa JC.  
722 Lysosomal and mitochondrial liaisons in Niemann-Pick disease. *Front Physiol.*  
723 2017;8:982.
- 724 59. Wu J, Prole DL, Shen Y, Lin Z, Gnanasekaran A, Liu Y, et al. Red fluorescent  
725 genetically encoded  $\text{Ca}^{2+}$  indicators for use in mitochondria and endoplasmic reticulum.  
726 *Biochem J.* 2014;464:13-22.
- 727 60. Suzuki J, Kanemaru K, Ishii K, Ohkura M, Okubo Y, Iino M. Imaging intraorganellar  
728  $\text{Ca}^{2+}$  at subcellular resolution using CEPIA. *Nat Commun.* 2014;5:4153.
- 729 61. Suzuki J, Kanemaru K, Iino M. Genetically encoded fluorescent indicators for  
730 organellar calcium imaging. *Biophys J.* 2016;111:1119-31.
- 731 62. Hirabayashi Y, Kwon SK, Paek H, Pernice WM, Paul MA, Lee J, et al. ER-  
732 mitochondria tethering by PDZD8 regulates  $\text{Ca}^{2+}$  dynamics in mammalian neurons.  
733 *Science.* 2017;358:623-30.

- 734 63. Konieczny V, Tovey SC, Mataragka S, Prole DL, Taylor CW. Cyclic AMP recruits a  
735 discrete intracellular  $\text{Ca}^{2+}$  store by unmasking hypersensitive  $\text{IP}_3$  receptors. *Cell Rep.*  
736 2017;18:711-22.
- 737 64. Rodriguez-Prados M, Rojo-Ruiz J, Aulestia FJ, Garcia-Sancho J, Alonso MT. A new  
738 low- $\text{Ca}^{2+}$  affinity GAP indicator to monitor high  $\text{Ca}^{2+}$  in organelles by luminescence.  
739 *Cell Calcium.* 2015;58:558-64.
- 740 65. Konieczny V, Keebler MV, Taylor CW. Spatial organization of intracellular  $\text{Ca}^{2+}$   
741 signals. *Semin Cell Dev Biol.* 2012;23:172-80.
- 742 66. Langeberg LK, Scott JD. Signalling scaffolds and local organization of cellular  
743 behaviour. *Nat Rev Mol Cell Biol.* 2015;16:232-44.
- 744 67. Ariotti N, Rae J, Giles N, Martel N, Sierceki E, Gambin Y, et al. Ultrastructural  
745 localisation of protein interactions using conditionally stable nanobodies. *PLoS Biol.*  
746 2018;16:e2005473.
- 747 68. Rost BR, Schneider-Warme F, Schmitz D, Hegemann P. Optogenetic tools for  
748 subcellular applications in neuroscience. *Neuron.* 2017;96:572-603.
- 749 69. Ruggiu AA, Bannwarth M, Johnsson K. Fura-2FF-based calcium indicator for protein  
750 labeling. *Org Biomol Chem.* 2010;8:3398-401.
- 751 70. Kamiya M, Johnsson K. Localizable and highly sensitive calcium indicator based on a  
752 BODIPY fluorophore. *Anal Chem.* 2010;82:6472-9.
- 753 71. Bannwarth M, Correa IR, Sztretye M, Pouvreau S, Fellay C, Aebischer A, et al. Indo-1  
754 derivatives for local calcium sensing. *ACS Chem Biol.* 2009;4:179-90.
- 755 72. Wang C, Song X, Xiao Y. SNAP-tag-based subcellular protein labeling and fluorescent  
756 imaging with naphthalimides. *ChemBioChem.* 2017;18:1762-9.



- 757 73. Abo M, Minakami R, Miyano K, Kamiya M, Nagano T, Urano Y, et al. Visualization  
758 of phagosomal hydrogen peroxide production by a novel fluorescent probe that is  
759 localized via SNAP-tag labeling. *Anal Chem.* 2014;86:5983-90.
- 760 74. Zimmermann M, Cal R, Janett E, Hoffmann V, Bochet CG, Constable E, et al. Cell-  
761 permeant and photocleavable chemical inducer of dimerization. *Angew Chem Int Ed*  
762 *Engl.* 2014;53:4717-20.
- 763 75. Feng S, Laketa V, Stein F, Rutkowska A, MacNamara A, Depner S, et al. A rapidly  
764 reversible chemical dimerizer system to study lipid signaling in living cells. *Angew*  
765 *Chem Int Ed Engl.* 2014;53:6720-3.
- 766 76. Putyrski M, Schultz C. Protein translocation as a tool: The current rapamycin story.  
767 *FEBS Lett.* 2012;586:2097-105.
- 768 77. Marschall AL, Dubel S, Boldicke T. Specific in vivo knockdown of protein function by  
769 intrabodies. *MAbs.* 2015;7:1010-35.
- 770 78. Michelangeli F, Ogunbayo OA, Wootton LL. A plethora of interacting organellar  $Ca^{2+}$   
771 stores. *Curr Opin Cell Biol.* 2005;17:135-40.
- 772 79. Wong AK, Capitanio P, Lissandron V, Bortolozzi M, Pozzan T, Pizzo P. Heterogeneity  
773 of  $Ca^{2+}$  handling among and within Golgi compartments. *J Mol Cell Biol.* 2013;5:266-  
774 76.
- 775 80. Crevenna AH, Blank B, Maiser A, Emin D, Prescher J, Beck G, et al. Secretory cargo  
776 sorting by  $Ca^{2+}$ -dependent Cab45 oligomerization at the trans-Golgi network. *J Cell*  
777 *Biol.* 2016;213:305-14.
- 778 81. Appenzeller C, Andersson H, Kappeler F, Hauri HP. The lectin ERGIC-53 is a cargo  
779 transport receptor for glycoproteins. *Nat Cell Biol.* 1999;1:330-4.

- 780 82. Mitchell KJ, Pinton P, Varadi A, Tacchetti C, Ainscow EK, Pozzan T, et al. Dense core  
781 secretory vesicles revealed as a dynamic  $\text{Ca}^{2+}$  store in neuroendocrine cells with a  
782 vesicle-associated membrane protein aequorin indicator. *J Cell Biol.* 2001;155:41-51.
- 783 83. Mundorf ML, Troyer KP, Hochstetler SE, Near JA, Wightman RM. Vesicular  $\text{Ca}^{2+}$   
784 participates in the catalysis of exocytosis. *J Biol Chem.* 2000;275:9136-42.
- 785 84. Harmansa S, Affolter M. Protein binders and their applications in developmental  
786 biology. *Development.* 2018;145:dev148874.
- 787 85. Tiede C, Bedford R, Heseltine SJ, Smith G, Wijetunga I, Ross R, et al. Affimer proteins  
788 are versatile and renewable affinity reagents. *eLife.* 2017;6:e24903.
- 789 86. Sha F, Salzman G, Gupta A, Koide S. Monobodies and other synthetic binding proteins  
790 for expanding protein science. *Protein Sci.* 2017;26:910-24.
- 791 87. Wozniak MJ, Bola B, Brownhill K, Yang YC, Levakova V, Allan VJ. Role of kinesin-1  
792 and cytoplasmic dynein in endoplasmic reticulum movement in VERO cells. *J Cell Sci.*  
793 2009;122:1979-89.
- 794 88. Lopez Sanjurjo CI, Tovey SC, Prole DL, Taylor CW. Lysosomes shape  $\text{Ins}(1,4,5)\text{P}_3$ -  
795 evoked  $\text{Ca}^{2+}$  signals by selectively sequestering  $\text{Ca}^{2+}$  released from the endoplasmic  
796 reticulum. *J Cell Sci.* 2013;126:289-300.
- 797 89. Brailoiu E, Churamani D, Cai X, Schrlau MG, Brailoiu GC, Gao X, et al. Essential  
798 requirement for two-pore channel 1 in NAADP-mediated calcium signaling. *J Cell*  
799 *Biol.* 2009;186:201-19.
- 800 90. Kanda T, Sullivan KF, Wahl GM. Histone-GFP fusion protein enables sensitive  
801 analysis of chromosome dynamics in living mammalian cells. *Curr Biol.* 1998;8:377-  
802 85.
- 803 91. English AR, Voeltz GK. Rab10 GTPase regulates ER dynamics and morphology. *Nat*  
804 *Cell Biol.* 2013;15:169-78.

- 805 92. Cheeseman LP, Harry EF, McAinsh AD, Prior IA, Royle SJ. Specific removal of  
806 TACC3-ch-TOG-clathrin at metaphase deregulates kinetochore fiber tension. *J Cell*  
807 *Sci.* 2013;126:2102-13.
- 808 93. Goedhart J, von Stetten D, Noirclerc-Savoye M, Lelimosin M, Joosen L, Hink MA, et  
809 al. Structure-guided evolution of cyan fluorescent proteins towards a quantum yield of  
810 93%. *Nat Commun.* 2012;3:751.
- 811 94. Violin JD, Ren XR, Lefkowitz RJ. G-protein-coupled receptor kinase specificity for b-  
812 arrestin recruitment to the b<sub>2</sub>-adrenergic receptor revealed by fluorescence resonance  
813 energy transfer. *J Biol Chem.* 2006;281:20577-88.
- 814 95. Schindelin J, Arganda-Carreras I, Frise E, Kaynig V, Longair M, Pietzsch T, et al. Fiji:  
815 an open-source platform for biological-image analysis. *Nat Methods.* 2012;9:676-82.
- 816 96. Jaqaman K, Loerke D, Mettlen M, Kuwata H, Grinstein S, Schmid SL, et al. Robust  
817 single-particle tracking in live-cell time-lapse sequences. *Nat Methods.* 2008;5:695-  
818 702.
- 819 97. Bolte S, Cordelieres FP. A guided tour into subcellular colocalization analysis in light  
820 microscopy. *J Microsc.* 2006;224:213-32.

821

822

823 **Fig 1. Nanobody fusions for visualizing and manipulating intracellular signalling.**

824 Plasmids were generated that encode nanobodies specific for GFP variants (GNab) or RFP  
825 variants (RNab), fused to functional modules. Nanobody fusions with an N-terminal signal  
826 sequence to target them to the secretory pathway are also shown (ss-GNab and ss-RNab).

827

828 **Fig 2. RNab and GNab fusion proteins bind to their respective tagged proteins in live**

829 **cells. (A)** Schematic of the RNab-GFP fusion binding to RFP. **(B)** HeLa cells expressing  
830 RNab-GFP with RFP-tagged markers for the ER surface (mCh-Sec61 $\beta$ ), the mitochondrial  
831 surface (TOM20-mCh), the nucleus (H2B-mCh) or the surface of lysosomes (TPC2-mRFP).  
832 Cells were imaged in HBS using epifluorescence microscopy (cells expressing H2B-mCh) or  
833 TIRFM (other cells). Yellow boxes indicate regions enlarged in the subsequent panels.

834 Colocalization values (Pearson's coefficient,  $r$ ) were: mCh-Sec61 $\beta$  ( $r = 0.93 \pm 0.09$ ,  $n = 10$   
835 cells); TOM20-mCh ( $r = 0.94 \pm 0.09$ ,  $n = 10$  cells); H2B-mCh ( $r = 0.97 \pm 0.06$ ,  $n = 10$  cells)  
836 and TPC2-mRFP ( $r = 0.78 \pm 0.09$ ,  $n = 5$  cells). **(C)** Schematic of the GNab-mCh fusion

837 binding to GFP. **(D)** HeLa cells co-expressing GNab-mCh with GFP-tagged markers for the  
838 ER surface (GFP-ERcyt), the mitochondrial surface (TOM20-GFP) and the nucleus (H2B-  
839 GFP), or an mTurquoise2-tagged ER-surface marker (mTurq-ERcyt). Cells were imaged  
840 using epifluorescence microscopy (cells expressing H2B-GFP) or TIRFM (other cells).

841 Yellow boxes indicate regions enlarged in the subsequent panels. Colocalization values were:  
842 GFP-ERcyt ( $r = 0.92 \pm 0.08$ ,  $n = 8$  cells); TOM20-GFP ( $r = 0.87 \pm 0.05$ ,  $n = 7$  cells); H2B-  
843 GFP ( $r = 0.94 \pm 0.07$ ,  $n = 6$  cells) and mTurq-ERcyt ( $r = 0.97 \pm 0.03$ ,  $n = 7$  cells). Scale bars  
844 10  $\mu\text{m}$  (main images) or 2.5  $\mu\text{m}$  (enlargements).

845 **Fig 3. Targeting RNab- $\text{Ca}^{2+}$  sensors to RFP-tagged proteins.** (A) Schematic of RNab-  
846 GGECO fusion binding to RFP. (B-D) HeLa cells expressing RNab-GGECO1.2 and TOM20-  
847 mCh, before and after addition of histamine (100  $\mu\text{M}$ ) and then ionomycin (5  $\mu\text{M}$ ). Cells  
848 were imaged in HBS using TIRFM. The TOM20-mCh image is shown after the histamine  
849 and ionomycin additions. The merged images are shown using images of RNab-GGECO1.2  
850 after ionomycin (B, C) or histamine (D). The yellow and cyan boxed regions in panel B are  
851 shown enlarged in panels C and D, respectively. Scale bars are 10  $\mu\text{m}$  (B) or 1.25  $\mu\text{m}$  (C, D).  
852 (E) Timecourse of the effects of histamine (100  $\mu\text{M}$ ) and ionomycin (5  $\mu\text{M}$ ) on the  
853 fluorescence of RNab-GGECO1.2 ( $F/F_0$ , where  $F$  and  $F_0$  are fluorescence recorded at  $t$  and  $t$   
854  $= 0$ ). The traces are from regions coinciding with a single mitochondrion or cytosol (regions  
855 identified in panel D), indicating changes in  $[\text{Ca}^{2+}]$  at the OMM. (F) Enlarged region (70-180  
856 s) of the graph shown in E. Results are representative of cells from 13 independent  
857 experiments.

858 **Fig 4. Targeted GNab-Ca<sup>2+</sup> sensors detect changes in [Ca<sup>2+</sup>] at the surface of**  
859 **mitochondria.** (A) Schematic of GNab-RGECO fusions binding to GFP. (B, C)  
860 Representative HeLa cells co-expressing TOM20-GFP and GNab-RGECO1.2 imaged in HBS  
861 using TIRFM before and after addition of histamine (100  $\mu$ M) and then ionomycin (5  $\mu$ M).  
862 The TOM20-GFP images are shown after the histamine and ionomycin additions. Histamine  
863 and ionomycin evoked changes in fluorescence of GNab-RGECO1.2 at the OMM. (D-F)  
864 Similar analyses of HeLa cells co-expressing TOM20-GFP and and GNab-LAR-GECO1.2  
865 (GNab-LARG1.2). Histamine (100  $\mu$ M) evoked changes in fluorescence of GNab-LARG1.2  
866 at the OMM of mitochondria in the perinuclear region (region of interest 1 (ROI 1) in E), but  
867 not in a peripheral region (ROI 2 in F). All mitochondria responded to ionomycin (5  $\mu$ M),  
868 indicating that histamine evoked local changes in [Ca<sup>2+</sup>] at the OMM. The cyan and yellow  
869 boxed regions in D are shown enlarged in E and F, respectively. Scale bars 10  $\mu$ m (B, D) or  
870 2.5  $\mu$ m (C, E, F). (G) Timecourse of the changes in fluorescence of GNab-RGECO1.2 at the  
871 OMM evoked by histamine and ionomycin for the entire cell shown in B. (H) Fluorescence  
872 changes recorded from ROI 1 and ROI 2 in panels E and F. Results are representative of cells  
873 from 4 independent experiments.

874 **Fig 5. Targeting H<sup>+</sup> sensors to RFP-tagged and GFP-tagged proteins.** (A) Schematic of  
875 RNab fused to the pH sensor superecliptic pHluorin (RNab-SEpH) and bound to RFP. (B)  
876 Schematic of GNab-pHuji binding to RFP. (C, D) HeLa cells co-expressing RNab-SEpH and  
877 TOM20-mCh were imaged in modified HBS (MHBS) using epifluorescence microscopy and  
878 exposed to extracellular pH 6.5 (C) or pH 8 (D) in the presence of nigericin (10  $\mu$ M). Scale  
879 bars 10  $\mu$ m. (E, F) HeLa cells co-expressing GNab-pHuji and TOM20-GFP were exposed to  
880 extracellular pH 6.5 (E) or pH 8 (F) in the presence of nigericin. Scale bars 10  $\mu$ m. (G, H)  
881 Timecourse from single cells of the fluorescence changes ( $F/F_0$ ) of mitochondrially targeted  
882 RNab-SEpH or GNab-pHuji evoked by the indicated manipulations of extracellular pH.  
883 Results shown are representative of 3 independent experiments.

884

885 **Fig 6. Targeting an ATP/ADP sensor to RFP-tagged proteins.** (A) Schematic of RNab-  
886 Perceval-HR fusion (RNab-PHR) bound to RFP. (B) HeLa cells co-expressing RNab-PHR  
887 and TOM20-mCh were imaged in HBS using epifluorescence microscopy. The yellow box  
888 indicates the region enlarged in subsequent panels. Scale bars 10  $\mu$ m (main image) and 2.5  
889  $\mu$ m (enlarged images). (C, D) Changes in fluorescence for each excitation wavelength (405  
890 and 488 nm,  $F/F_0$ ) (C) and their ratio ( $R/R_0$ , where  $R = F_{405}/F_{488}$ ) (D) of mitochondrially  
891 targeted RNab-PercevalHR after addition of 2-deoxyglucose (2DG, 10 mM), oligomycin  
892 (OM, 1  $\mu$ M) and antimycin (AM, 1  $\mu$ M). The results indicate a decrease in the ATP/ADP  
893 ratio at the OMM. Results are representative of 3 independent experiments.

894 **Fig 7. Nanobody-SNAPf fusion proteins allow labelling of RFP-tagged and GFP-tagged**  
895 **proteins with fluorescent O<sup>6</sup>-benzylguanine derivatives in live cells. (A, B) Schematics of**  
896 RNab-SNAPf fusion bound to RFP, and GNab-SNAPf fusion bound to GFP, after labelling  
897 with SNAP-Cell-647-SiR (magenta circles). **(C-F)** HeLa cells co-expressing RNab-SNAPf  
898 and mitochondrial TOM20-mCh (C), RNab-SNAPf and lysosomal LAMP1-mCh (D), GNab-  
899 SNAPf and TOM20-GFP (E) or GNab-SNAPf and LAMP1-GFP (F) were treated with  
900 SNAP-Cell-647-SiR (0.5  $\mu$ M, 30 min at 37°C) and imaged using TIRFM. Scale bars 10  $\mu$ m  
901 (main images) or 2.5  $\mu$ m (enlarged images). Colocalization values: RNab-SNAPf + TOM20-  
902 mCh ( $r = 0.95 \pm 0.02$ ,  $n = 6$  cells); RNab-SNAPf + LAMP1-mCh ( $r = 0.84 \pm 0.06$ ,  $n = 8$   
903 cells); GNab-SNAPf + TOM20-GFP ( $r = 0.78 \pm 0.09$ ,  $n = 10$  cells); and GNab-SNAPf +  
904 LAMP1-GFP ( $r = 0.85 \pm 0.10$ ,  $n = 11$  cells).



905 **Fig 8. Targeting CALI to lysosomes using RNab-SNAPf reduces lysosomal motility. (A)**  
906 Schematic of RNab-SNAPf after labelling with SNAP-Cell-fluorescein (green circle) and  
907 bound to RFP. **(B)** HeLa cells co-expressing LAMP1-mCh and RNab-SNAPf were incubated  
908 with SNAP-Cell-fluorescein (0.5  $\mu$ M, 30 min, 37°C), which labelled lysosomes  
909 (colocalization values,  $r = 0.73 \pm 0.02$ ,  $n = 6$  cells), and imaged using TIRFM. **(C, D)** Cells  
910 were then exposed to 488-nm light for 3 s to induce CALI. TIRFM images show a  
911 representative cell at different times before **(C)** and after **(D)** CALI, with the image at  $t = 0$  s  
912 shown in magenta and the image at  $t = 60$  s in green. White in the merged image indicates  
913 immobile lysosomes, while green and magenta indicate lysosomes that moved in the interval  
914 between images. Yellow boxes show regions enlarged in subsequent images. Scale bars 10  
915  $\mu$ m (main images) and 2.5  $\mu$ m (enlargements). For clarity, images were auto-adjusted for  
916 brightness and contrast (ImageJ) to compensate for bleaching of mCh during tracking and  
917 CALI. **(E)** Effect of CALI on the displacements of individual lysosomes, determining by  
918 particle-tracking (TrackMate), during a 60-s recording from a representative cell (images  
919 taken every 1 s). **(F)** Summary data (mean  $\pm$  SEM,  $n = 6$  cells from 6 independent  
920 experiments) show the mean fractional decrease in displacement ( $\Delta$ Displacement) due to  
921 CALI in cells expressing RNab-SNAPf or cytosolic SNAPf (see *Additional file 1: Fig. S2*).  
922 The fractional decrease in displacement for each cell was defined as:  $(MD_{pre} - MD_{post}) /$   
923  $MD_{pre}$ , where  $MD_{pre}$  and  $MD_{post}$  are the mean displacement of all tracked particles in 60 s  
924 before and after CALI. \*  $p < 0.05$ , unpaired Student's  $t$ -test.

925 **Fig 9. Clustering of RFP-tagged and GFP-tagged proteins and organelles using RNab-**  
926 **mCerulean-MP and GNab-mRFP-MP.** (A) Schematic of RNab-mCerulean-MP fusion  
927 bound to RFP. (B) Schematic of GNab-mRFP-MP fusion bound to GFP. (C-F) HeLa cells  
928 expressing RFP-tagged proteins in the absence (C, E) or presence (D, F) of co-expressed  
929 RNab-mCerulean-MP (RNab-mCer-MP) were imaged using epifluorescence microscopy. (G-  
930 N) HeLa cells expressing GFP-tagged proteins in the absence (G, I, K, M) or presence (H, J,  
931 L, N) of co-expressed GNab-mRFP-MP were imaged using epifluorescence microscopy.  
932 Results are representative of at least 5 cells, from at least 3 independent experiments. Scale  
933 bars 10  $\mu\text{m}$ .

934 **Fig 10. RNab-FKBP inducibly recruits ER transmembrane proteins to mitochondria.**  
935 (A) Schematic of RNab-FKBP bound to RFP. (B) Schematic of GNab-FKBP bound to GFP.  
936 (C, D) HeLa cells co-expressing RNab-FKBP, mitochondrial TOM70-GFP-FRB and mCh-  
937 Sec61 $\beta$  were imaged using TIRFM. A representative cell (n = 7) is shown before (C) and  
938 after (D) treatment with rapamycin (100 nM, 10 min). The boxed region is enlarged in  
939 subsequent images. Scale bars 10  $\mu$ m (main images) and 2.5  $\mu$ m (enlargements). (E)  
940 Timecourse of mCh-Sec61 $\beta$  fluorescence changes ( $F/F_0$ ) evoked by rapamycin recorded at a  
941 representative mitochondrion and in nearby reticular ER. Results show ~80% loss of  
942 fluorescence from the ER devoid of mitochondrial contacts. (F, G) HeLa cells co-expressing  
943 endogenously tagged GFP-IP<sub>3</sub>R1, GNab-FKBP and mitochondrial TOM70-mCh-FRB were  
944 imaged using TIRFM. A representative cell (n = 6) is shown before (F) and after (G)  
945 treatment with rapamycin (100 nM, 10 min). The boxed region is enlarged in subsequent  
946 images. Scale bars 10  $\mu$ m (main images) and 2.5  $\mu$ m (enlargements). (H) HeLa cells co-  
947 expressing GFP-calmodulin (GFP-CaM), GNab-FKBP and TOM20-mCh-FRB were imaged  
948 using epifluorescence microscopy. A representative cell (n = 3) is shown before and after  
949 treatment with rapamycin (100 nM, 10 min). The image for TOM-mCh-FRB is shown in the  
950 presence of rapamycin. Scale bar 10  $\mu$ m.

951 **Fig 11. Reversible optogenetic recruitment of RFP-tagged proteins using RNab-zdk1.**

952 (A) Schematic of RNab-zdk1 fusion bound to RFP, showing the reversible light-evoked  
953 dissociation of zdk1 from LOV2. (B) HeLa cells co-expressing RNab-zdk1, mitochondrial  
954 TOM20-LOV2 and cytosolic mCh were imaged using TIRFM. A representative cell is shown  
955 before and after one or five 1-s exposures to blue light (488-nm laser at 2-s intervals) and  
956 after a 3-min recovery period in the dark. Scale bar 10  $\mu$ m. (C) Timecourse of the mCherry  
957 fluorescence changes ( $F/F_0$ ) recorded at a representative mitochondrion and in nearby cytosol  
958 after each of the indicated light flashes. There is a reversible decrease ( $\sim 60\%$ ) in  
959 mitochondrial mCh fluorescence and a corresponding reversible increase ( $\sim 70\%$ ) in cytosolic  
960 fluorescence. A single measurement of mCh fluorescence was made at the end of a 3-min  
961 recovery period in the dark (REC) before further light flashes. Results are representative of 5  
962 cells from 3 independent experiments.

963

964 **Fig 12. Recruitment of proteins to native PM-mitochondria MCS using RNab-FKBP.**

965 (A) Schematic of RNab-FKBP fusion bound to RFP. (B, C) HeLa cells co-expressing RNab-  
966 FKBP, mitochondrial TOM70-GFP-FRB and  $\beta_2$ AR-mCh were imaged using TIRFM before  
967 (B) and after (C) treatment with rapamycin (100 nM, 10 min). Scale bar 10  $\mu$ m. (D, E)  
968 Enlarged images from C of the yellow box (D) and cyan box (E) show punctate recruitment  
969 of  $\beta_2$ AR-mCh to individual mitochondria at the indicated times after addition of rapamycin.  
970 Scale bars 1.25  $\mu$ m. (F) TIRFM images of HeLa cells co-expressing mitochondrial TOM70-  
971 GFP-FRB and  $\beta_2$ AR-mCh in the presence of rapamycin (100 nM, 10 min) show no  
972 recruitment in the absence of co-expressed RNab-FKBP. The yellow box shows a region  
973 enlarged in the subsequent image. Scale bars 10  $\mu$ m (main images) and 2.5  $\mu$ m (enlargement).  
974 Results (B-F) are representative of 5 independent experiments.

975 **Fig 13. Recruitment of PM proteins to ER-PM MCS using RNab-FKBP.** (A) Schematic  
976 of RNab-FKBP fusion bound to RFP. (B) HeLa cells co-expressing RNab-FKBP, mCh-Orai1  
977 and the ER-PM junction marker GFP-MAPPER-FRB were imaged using TIRFM. A  
978 representative cell (n = 5) is shown before (top row) and after (bottom row) treatment with  
979 rapamycin (100 nM, 10 min). The boxed region is shown enlarged in subsequent images. (C)  
980 HeLa cells co-expressing mCh-Orai1 and GFP-MAPPER-FRB alone were imaged using  
981 TIRFM. A representative cell (n = 3) is shown before (top row) and after (bottom row)  
982 treatment with rapamycin (100 nM, 10 min). The boxed region is shown enlarged in  
983 subsequent images. The results show no recruitment in the absence of co-expressed RNab-  
984 FKBP. Scale bars (B, C) 10  $\mu\text{m}$  (main images) and 2.5  $\mu\text{m}$  (enlargements).

985

986 **Fig 14. Inducible recruitment of lysosomes to mitochondria using GNab-FKBP.** (A)  
987 Schematic of GNab-FKBP fusion bound to GFP. (B) HeLa cells co-expressing mitochondrial  
988 TOM70-mCh-FRB (magenta), lysosomal LAMP1-GFP (green) and GNab-FKBP were  
989 imaged using TIRFM. Merged images of a representative cell (n = 5) are shown before and at  
990 times after treatment with rapamycin (rapa, 100 nM). Scale bar 10  $\mu\text{m}$ . (C) Enlargements of  
991 the boxed region in (B). Scale bar 2.5  $\mu\text{m}$ . (D) HeLa cells co-expressing TOM70-mCh-FRB  
992 (magenta) and lysosomal LAMP1-GFP (green) were imaged using TIRFM. A representative  
993 cell (n = 3) is shown before and after treatment with rapamycin (100  $\mu\text{m}$ , 10 min); there is no  
994 recruitment in the absence of co-expressed GNab-FKBP. The yellow box shows a region  
995 enlarged in the subsequent image. Scale bars 10  $\mu\text{m}$  (main images) and 2.5  $\mu\text{m}$  (enlargement).

996 **Fig 15. Crosslinking GFP-tagged and RFP-tagged proteins and organelles using GNab-**  
997 **RNab.** (A) Schematic of GNab-RNab bound to GFP and RFP. (B-E) HeLa cells co-  
998 expressing the tagged proteins indicated with GNab-RNab were imaged using  
999 epifluorescence microscopy (B) or TIRFM (C-E). Representative cells (n = 5-7) are shown.  
1000 Control images for GFP-IP<sub>3</sub>R1 are shown in *Fig. 10* and *Additional file 1: Fig S3*. (F, G)  
1001 HeLa cells co-expressing LAMP1-GFP and LAMP1-mCh in the absence (F) or presence (G)  
1002 of co-expressed GNab-RNab were imaged using TIRFM. Representative cells (n = 5) are  
1003 shown. Scale bars (B-G) 10 μm (main images) and 2.5 μm (enlargements of boxed areas).

1004

1005 **Fig 16. Inducible crosslinking of RFP-tagged and GFP-tagged proteins with GNab-**  
1006 **FKBP and RNab-FRB.** (A) Schematic of the nanobody fusions used, with rapamycin shown  
1007 as a blue sphere. (B, C) HeLa cells co-expressing GNab-FKBP, RNab-FRB, TOM20-GFP  
1008 and mCh-Sec61β were imaged using TIRFM. A representative cell (n = 3) is shown before  
1009 (B) and after (C) treatment with rapamycin (100 nM, 10 min). Scale bars 10 μm (main  
1010 images) and 2.5 μm (enlargements of boxed areas).

1011 **Fig 17. Nanobody fusions can be targeted to different luminal compartments of the**  
1012 **secretory pathway. (A)** Schematic of ssGNab-mCh bound to GFP. **(B)** HeLa cells co-  
1013 expressing ssGNab-mCh and either the luminal ER marker mTurquoise2-ERlumen, the  
1014 marker of ER-PM junctions GFP-MAPPER, or the Golgi marker GFP-Golgi. Cells were  
1015 imaged using epifluorescence microscopy. Representative cells are shown. Colocalization  
1016 values were: mTurquoise2-ERlumen ( $r = 0.96 \pm 0.03$ ,  $n = 10$ ); GFP-MAPPER ( $r = 0.94 \pm$   
1017  $0.02$ ,  $n = 5$ ); and GFP-Golgi ( $r = 0.91 \pm 0.06$ ,  $n = 4$ ). **(C)** Schematic of ssRNab-GFP bound to  
1018 RFP. **(D)** HeLa cells co-expressing ssRNab-GFP and either mCh-ERlumen or mCh-MAPPER  
1019 were imaged using epifluorescence microscopy. Representative cells are shown.  
1020 Colocalization values were: mCh-ERlumen ( $r = 0.98 \pm 0.009$ ,  $n = 9$ ) and mCh-MAPPER ( $r =$   
1021  $0.93 \pm 0.07$ ,  $n = 13$ ). Scale bars 10  $\mu\text{m}$  (main images) and 2.5  $\mu\text{m}$  (enlargements).

1022 **Fig 18. Nanobody-mediated targeting of low-affinity Ca<sup>2+</sup> sensors allows measurement**  
1023 **of changes in [Ca<sup>2+</sup>] in an ER sub-compartment at ER-PM MCS. (A)** Schematic of  
1024 ssRNab-Ca<sup>2+</sup> sensor bound to RFP. **(B)** Schematic of ssGNab-Ca<sup>2+</sup> sensor bound to GFP. **(C-**  
1025 **F)** HeLa cells co-expressing the indicated combinations of mCh-MAPPER, GFP-MAPPER,  
1026 ssRNab-GCEPIA (ssRNab-GC), ssRNab-GEMCEPIA (ssRNab-GEM; image is shown for  
1027 the 525-nm emission channel), ssGNab-LAR-GECO1 (ssGNab-LGECO) or ssGNab-  
1028 RCEPIA were imaged in Ca<sup>2+</sup>-free HBS using TIRFM. Yellow boxes indicate regions  
1029 enlarged in subsequent images. Scale bars 10 μm (main images) and 2.5 μm (enlargements).  
1030 **(G-J)** Timecourses of fluorescence changes recorded from cells co-expressing mCh-  
1031 MAPPER and ssRNab-GCEPIA (G), mCh-MAPPER and ssRNab-GEMCEPIA (H), GFP-  
1032 MAPPER and ssGNab-LAR-GECO1 (ssGNab-LARG1) (I) and GFP-MAPPER and ssGNab-  
1033 RCEPIA (J) in response to emptying of intracellular Ca<sup>2+</sup> stores with ionomycin (5 μM). **(K)**  
1034 Summary results (mean ± SD, n = 4 cells) show mean fractional decreases (ΔF) in either  
1035 fluorescence or emission ratio (for ssRNab-GEM) recorded 90 s after addition of ionomycin.



1036 **Additional files**

1037

1038 **Additional file 1 (.pptx): Figures S1-S6**

1039

1040 **Fig. S1 Targeting RNab-GEMGECO Ca<sup>2+</sup> sensor to RFP-tagged proteins.** (A) Schematic  
1041 of RNab-GEMGECO fusion binding to RFP. (B) HeLa cells co-expressing RNab-  
1042 GEMGECO and TOM20-mCh were imaged in HBS using TIRFM. Images are shown before  
1043 and after addition of histamine (100  $\mu$ M) and then ionomycin (5  $\mu$ M). The TOM20-mCh and  
1044 merged images are before additions of histamine and ionomycin. The yellow boxed region in  
1045 shown enlarged in (C). Scale bar 10  $\mu$ m. (C) Enlarged regions from (B). Scale bar 2.5  $\mu$ m.  
1046 (D, E) Representative timecourses of histamine and ionomycin-evoked changes in  
1047 fluorescence (D) and fluorescence emission ratio ( $R/R_0 = F_{480}/F_{525}$ ) (E) of mitochondrially  
1048 targeted RNab-GEMGECO. Results are representative of cells from 4 independent  
1049 experiments.

1050 **Fig. S2 Targeting CALI to lysosomes with SNAP-Cell-fluorescein: cytosolic controls. (A)**  
1051 Schematic of cytosolic SNAPf, which does not bind to RFP, after its labelling with SNAP-  
1052 Cell-fluorescein. **(B-D)** HeLa cells co-expressing LAMP1-mCh and cytosolic SNAPf (Cyt-  
1053 SNAPf) were treated with SNAP-Cell-fluorescein (0.5  $\mu$ M, 30 min, 37°C) and imaged using  
1054 TIRFM. Scale bar 10  $\mu$ m. Cells were then exposed to 488-nm light for 3 s to induce CALI.  
1055 Images show a representative cell at different times before (C) and after (D) CALI, with the  
1056 image at t = 0 s shown in magenta and the image at t = 60 s in green. White in the merged  
1057 image indicates immobile lysosomes, while green and magenta indicate lysosomes that  
1058 moved during the 60 s between images. Yellow boxes show regions enlarged in subsequent  
1059 images. Scale bars 10  $\mu$ m (main images) and 2.5  $\mu$ m (enlargements). For clarity, images were  
1060 auto-adjusted for brightness and contrast (ImageJ) to compensate for bleaching of mCh  
1061 during tracking and CALI. **(E)** Displacements of individual lysosomes during a 60-s  
1062 recording (determined by TIRFM using TrackMate, with images taken every 1 s) for a  
1063 representative HeLa cell co-expressing LAMP1-mCh and cytosolic SNAPf before and after  
1064 CALI (3-s exposure to 488-nm light). Typical of n = 6 cells. Summary data are shown in **Fig.**  
1065 **8F**.

1066 **Fig. S3 Rapamycin alone does not recruit RFP-tagged or GFP-tagged proteins to**  
1067 **mitochondria.** (A, B) HeLa cells co-expressing mitochondrial TOM70-mCh-FRB and mCh-  
1068 Sec61 $\beta$  were imaged using TIRFM before (A) and after (B) addition of rapamycin (100 nM,  
1069 10 min). (C, D) HeLa cells co-expressing endogenously tagged GFP-IP<sub>3</sub>R1 and  
1070 mitochondrial TOM70-mCh-FRB were imaged using TIRFM before (C) and after (D)  
1071 addition of rapamycin (100 nM, 10 min). (E) HeLa cells co-expressing GFP-calmodulin  
1072 (GFP-CaM) and mitochondrial TOM70-mCh-FRB were imaged using TIRFM before and  
1073 after addition of rapamycin (100 nM, 10 min). Results are each representative of cells from 3-  
1074 5 independent experiments. Scale bars 10  $\mu$ m (main images) and 2.5  $\mu$ m (enlargements).

1075  
1076 **Fig. S4 Recruitment of proteins to native PM-mitochondria MCS using GNab-FKBP.**  
1077 (A) Schematic of GNab-FKBP fusion bound to GFP. (B) TIRFM images of COS-7 cells co-  
1078 expressing GNab-FKBP,  $\beta_2$ AR-GFP and TOM70-mCh-FRB. A representative cell (n = 3) is  
1079 shown before (top row) and at the indicated times after addition of rapamycin (100 nM).  
1080 Scale bar 10  $\mu$ m. (C) Enlargements of the boxed regions in (B). Scale bar 3.75  $\mu$ m.

1081  
1082 **Fig. S5 Inducible crosslinking of RFP-tagged and GFP-tagged proteins with RNab-**  
1083 **FKBP and GNab-FRB.** (A) Schematic of the nanobody fusions used, with rapamycin shown  
1084 as a blue sphere. (B, C) HeLa cells co-expressing RNab-FKBP, GNab-FRB, TOM20-GFP  
1085 and mCh-Sec61 $\beta$  were imaged using TIRFM. A representative cell (n = 3) is shown before  
1086 (B) and after (C) treatment with rapamycin (100 nM, 10 min). Scale bars 10  $\mu$ m (main  
1087 images) and 2.5  $\mu$ m (enlargements).

1088  
1089 **Fig. S6. DNA sequences encoding the nanobodies used.**

1090 **Additional file 2 (.wmv): Video 1. RNab-GGECO1.2 detects changes in  $[Ca^{2+}]$  at the**  
1091 **surface of mitochondria expressing TOM20-mCh.** The top panel shows RNab-GGECO1.2  
1092 fluorescence (488-nm TIRFM excitation) and the bottom panel shows TOM20-mCh  
1093 fluorescence (561-nm TIRFM excitation). In response to histamine (100  $\mu$ M, added at 60 s),  
1094 local rises in  $[Ca^{2+}]_c$  were detected at the surfaces of individual mitochondria, but not in the  
1095 bulk cytosol. Ionomycin (5  $\mu$ M) was added at 3 min. Video was acquired at 1 Hz and is  
1096 shown at 30 frames per second (fps). Clock is in min:s. Relates to **Fig. 3D**.

1097

1098 **Additional file 3 (.wmv): Video 2. GNab-LARGECO1.2 detects local changes in  $[Ca^{2+}]$**   
1099 **at the surface of mitochondria expressing TOM20-GFP.** The video shows GNab-  
1100 LARGECO1.2 fluorescence (488-nm TIRFM excitation). Histamine (100  $\mu$ M, added at 60 s)  
1101 causes local rises in  $[Ca^{2+}]_c$  at the OMM of individual mitochondria in the perinuclear region  
1102 (cyan box in **Fig. 4D**), but not in peripheral regions (e.g. yellow box in **Fig. 4D**). Ionomycin  
1103 (5  $\mu$ M) was added at 3 min. Video was acquired at 1 Hz and is shown at 33 fps. Clock is in  
1104 min:s. Relates to **Fig. 4D-F**.

1105

1106 **Additional file 4 (.wmv): Video 3. Effect of targeted CALI on lysosomal motility.** HeLa  
1107 cells expressing LAMP1-mCh and RNab-SNAPf were imaged using TIRFM and 561-nm  
1108 laser illumination before (top) and after (bottom) CALI (3.02 s exposure to 488-nm  
1109 epifluorescence laser illumination). Video was acquired at 0.5 Hz and is shown at 3 fps.  
1110 Clock is in min:s. Relates to **Fig. 8**.

1111 **Additional file 5 (.wmv): Video 4. RNab-FKBP rapidly sequesters an ER integral**  
1112 **membrane protein at the OMM.** TIRFM images of HeLa cells expressing TOM70-GFP-  
1113 FRB, RNab-FKBP and mCh-Sec61 $\beta$  were treated with rapamycin (100 nM, added at 60 s).  
1114 The ER membrane protein, mCh-Sec61 $\beta$ , is then rapidly sequestered at the OMM. Video  
1115 was acquired at 0.5 Hz and shown at 33 fps. Clock is in min:s. Relates to *Fig. 10C* and *D*.

1116

1117 **Additional file 6 (.wmv): Video 5. GNab-FKBP rapidly sequesters endogenously tagged**  
1118 **GFP-IP<sub>3</sub>R1 at the OMM.** TIRFM images show HeLa cells with endogenously GFP-tagged  
1119 IP<sub>3</sub>R1 and transiently expressing TOM70-mCh-FRB and GNab-FKBP and then treated with  
1120 rapamycin (100 nM, added at 60 s). GFP-IP<sub>3</sub>R1 is rapidly sequestered at the OMM. Video  
1121 was acquired at 0.5 Hz and is shown at 33 fps. Clock is in min:s. Relates to *Fig. 10F* and *G*.

1122 .

1123 **Additional file 7 (.wmv): Video 6. GNab-FKBP rapidly sequesters GFP-CaM at the**  
1124 **OMM.** Epifluorescence microscopy images show HeLa cells transiently expressing GFP-  
1125 CaM, GNab-FKBP and TOM20-mCh-FRB, and then treated with rapamycin (100 nM, added  
1126 at 60 s). GFP-CaM is rapidly sequestered at the OMM. Video was acquired at 0.5 Hz and is  
1127 shown at 9 fps. Clock is in min:s. Relates to *Fig. 10H*.

1128

1129 **Additional file 8 (.wmv): Video 7. RNab-FKBP recruits a PM protein to the OMM in**  
1130 **response to rapamycin.** TIRFM images of HeLa cells expressing TOM70-GFP-FRB, RNab-  
1131 FKBP and the PM protein,  $\beta_2$ AR-mCh, and then exposed to rapamycin (100 nM, added at 60  
1132 s). There is a rapid translocation of  $\beta_2$ AR-mCh to the OMM. Video was acquired at 0.5 Hz  
1133 and is shown at 33 fps. Clock is in min:s. Relates to *Fig. 12B-E*.

1134

1135 **Additional file 9 (.wmv): Video 8. Crosslinking GNab-FKBP and RNab-FRB with**  
1136 **rapamycin recruits mCh-Sec61 $\beta$  to TOM20-GFP in the OMM.** HeLa cells expressing  
1137 GNab-FKBP, RNab-FRB, mCh-Sec61 $\beta$  and TOM20-GFP were stimulated with rapamycin  
1138 (100 nM, added at 100 s). The TIRFM images show rapid recruitment of mCh-Sec61 $\beta$  to the  
1139 OMM. Video was acquired at 0.2 Hz and is shown at 8 fps. Clock is in min:s. Relates to **Fig.**  
1140 **16.**

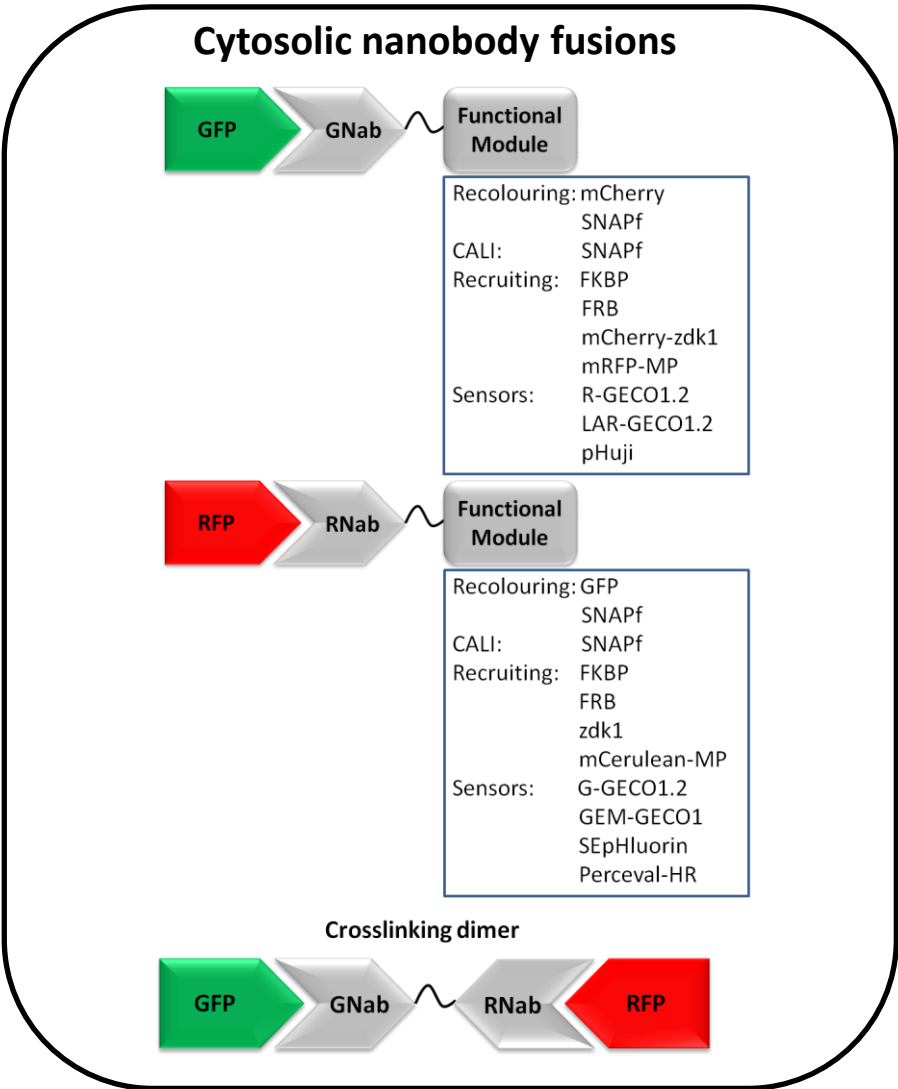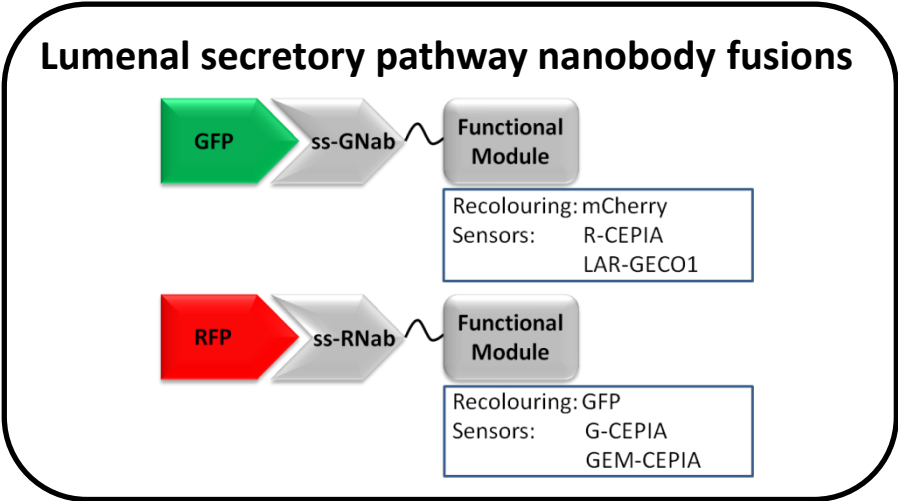

Figure 1.

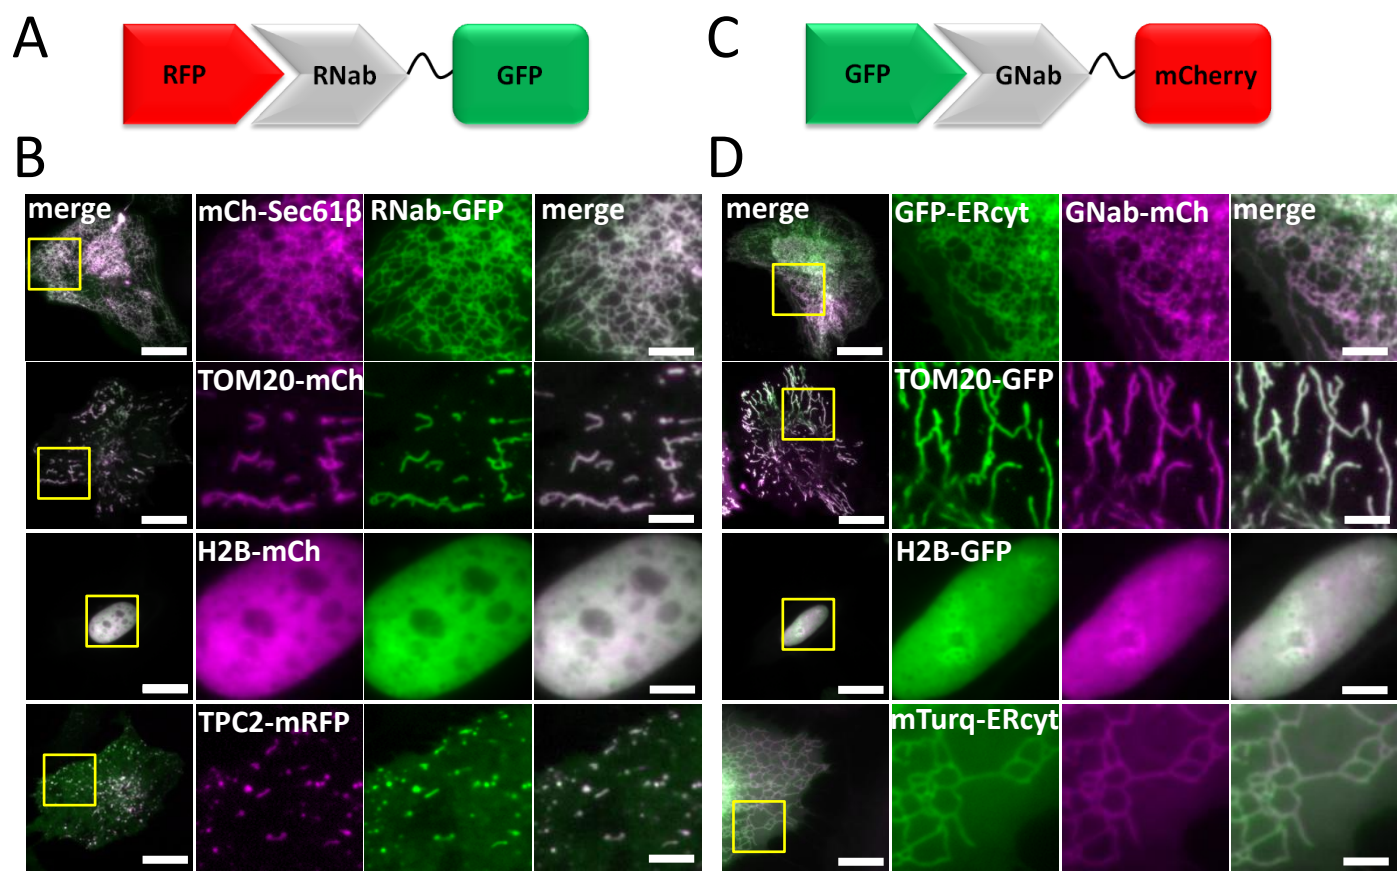

Figure 2.



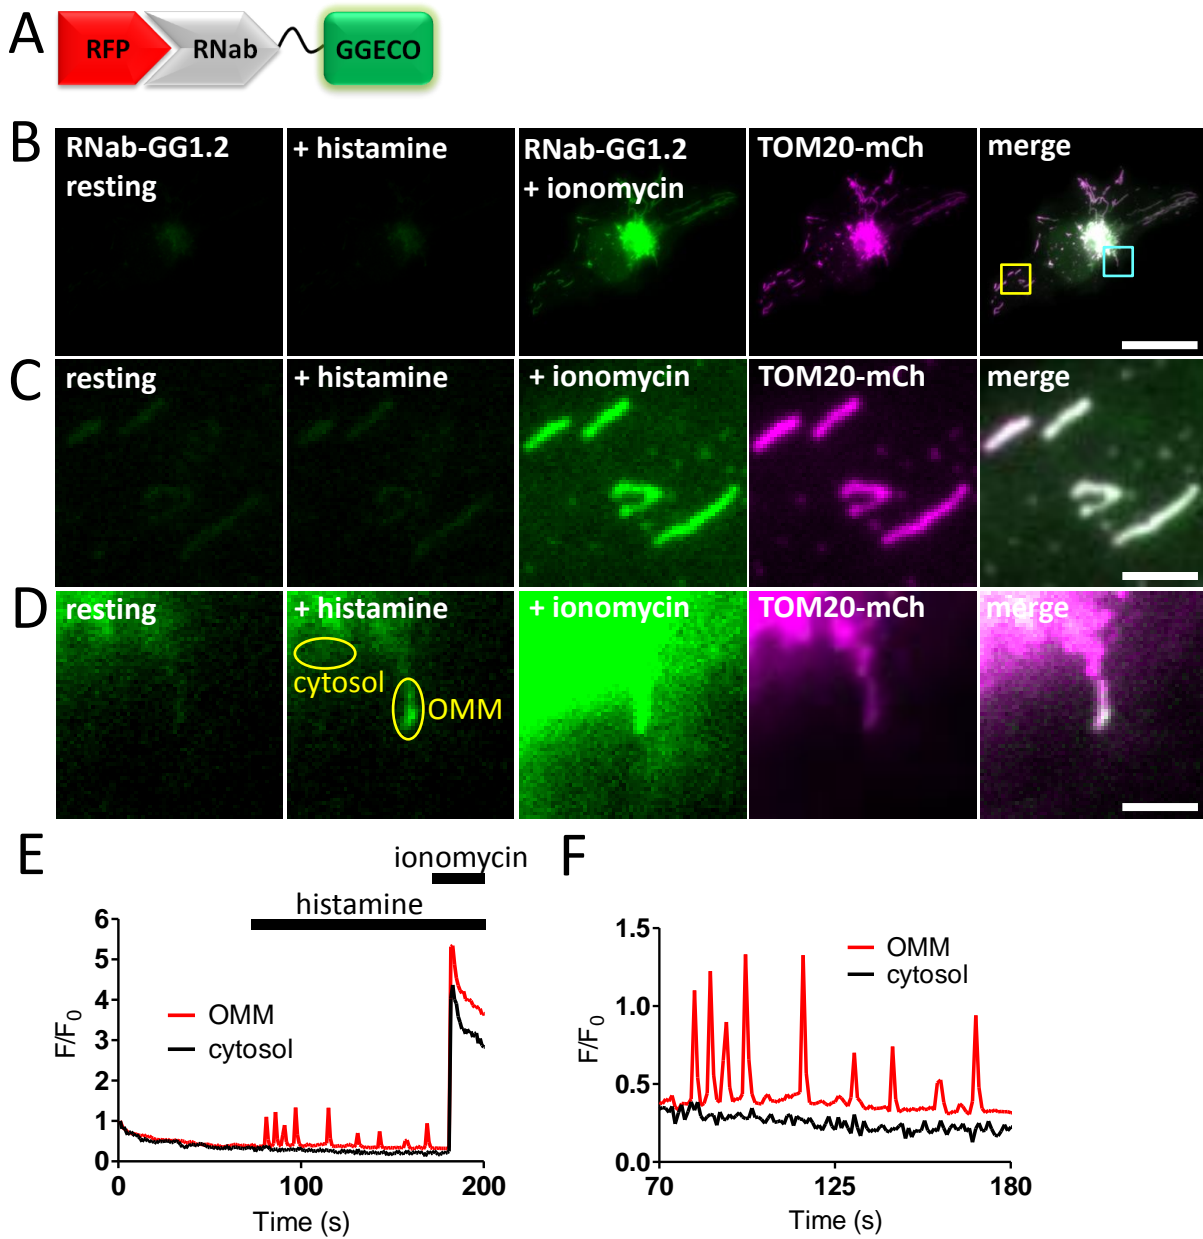

Figure 3.

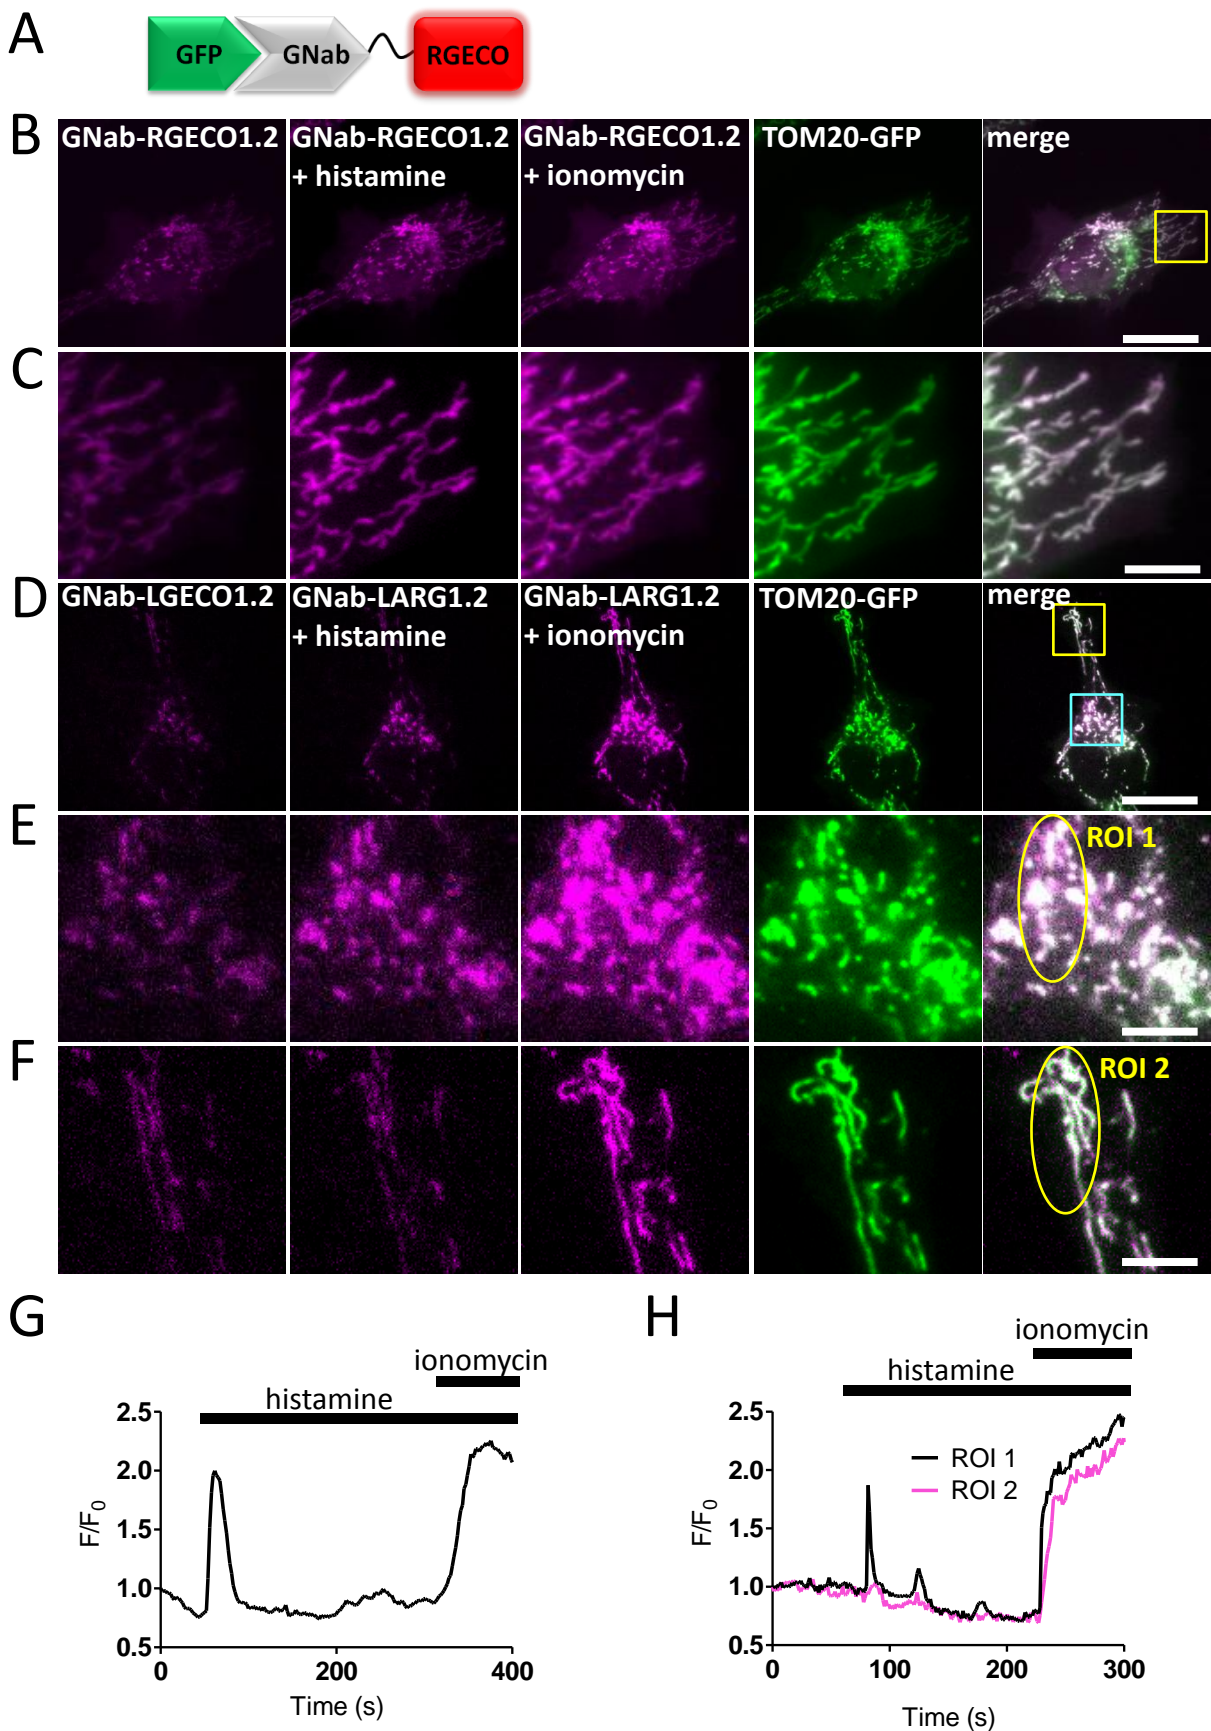

**Figure 4.**

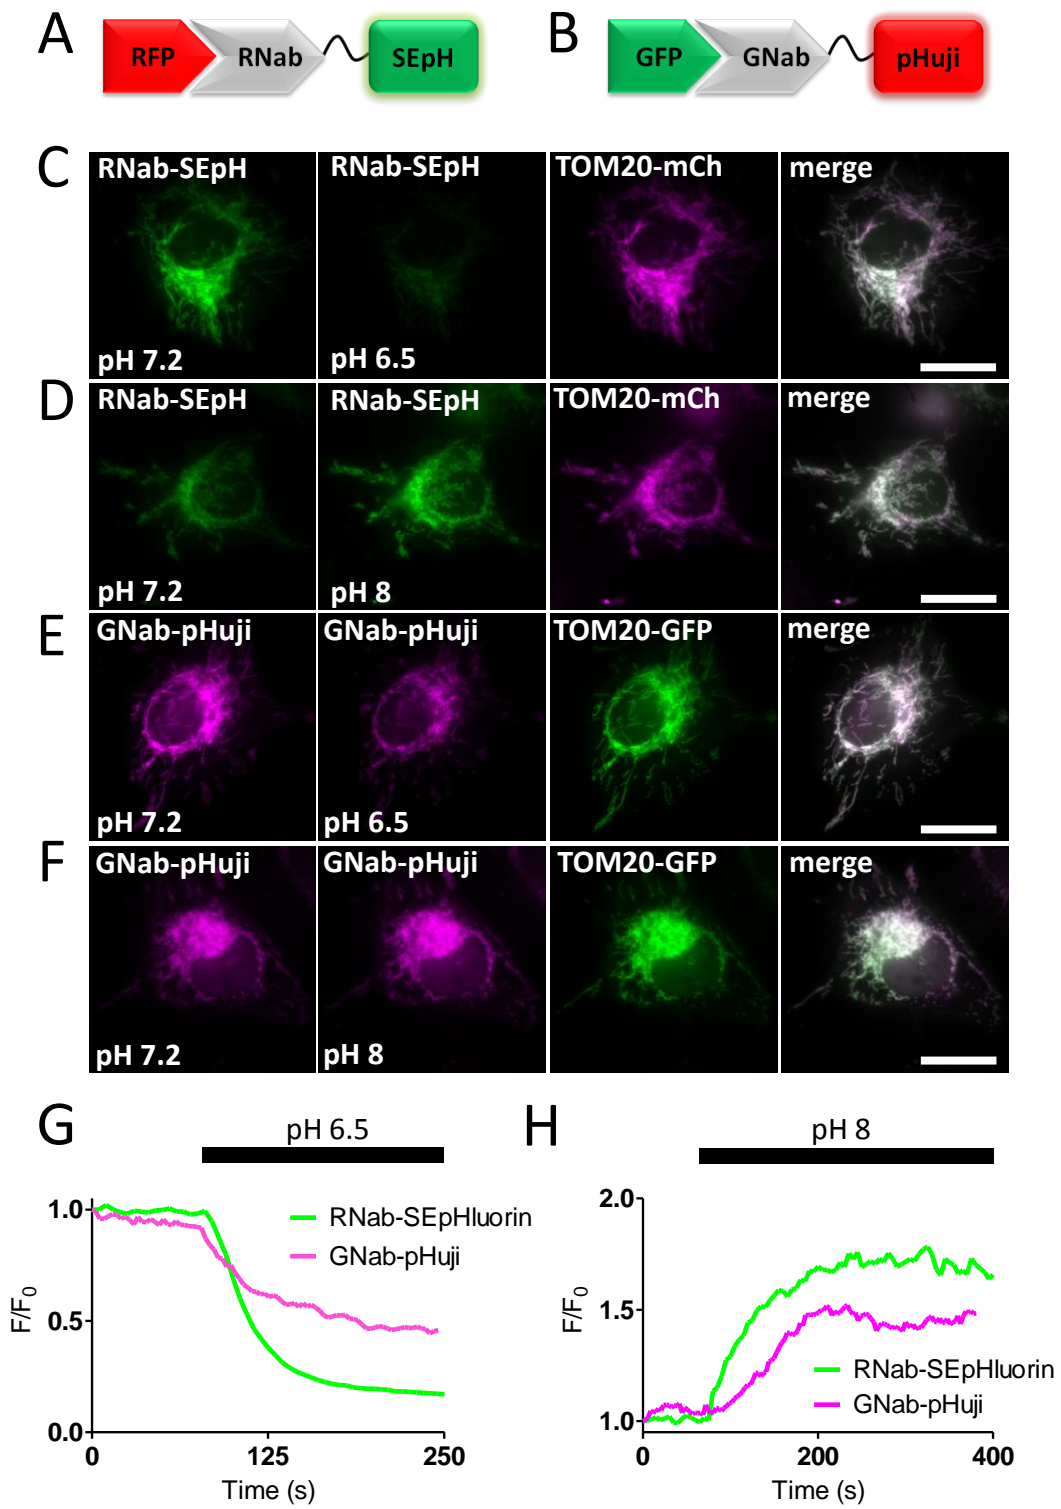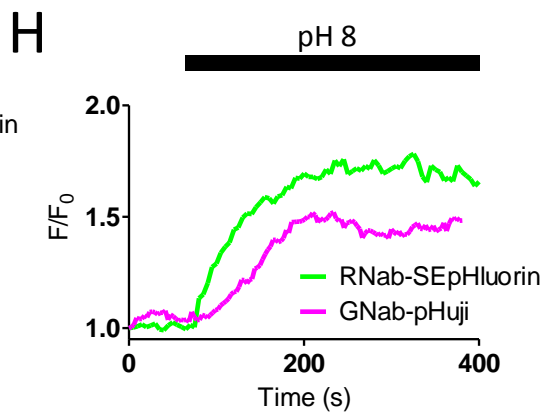

Figure 5.

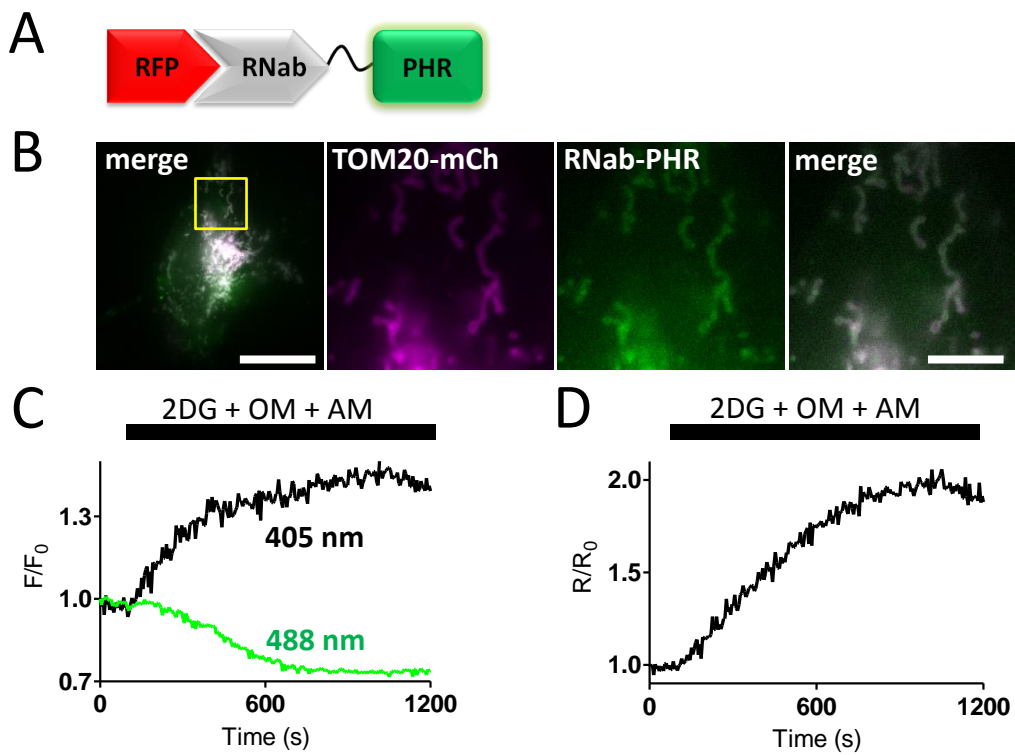

Figure 6.

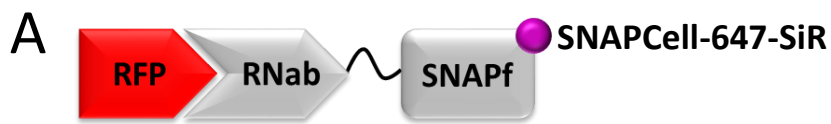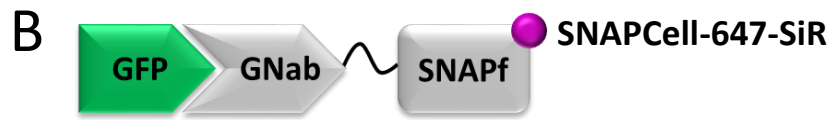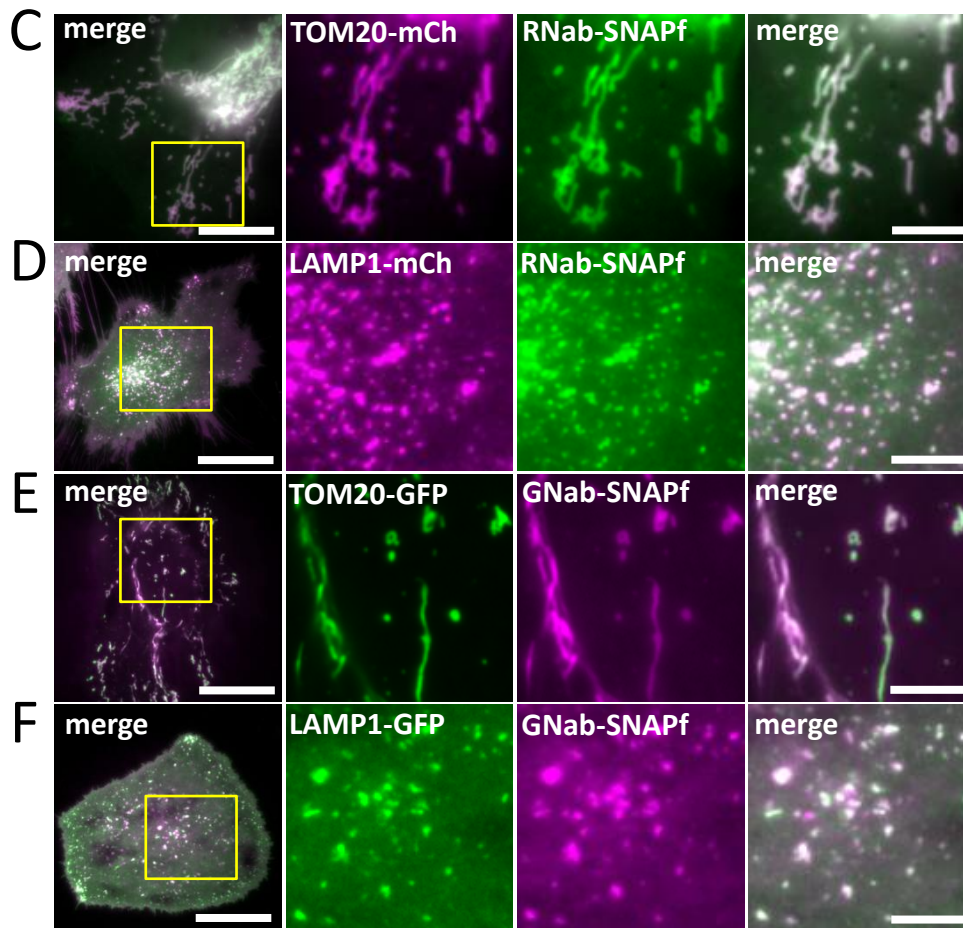

Figure 7.

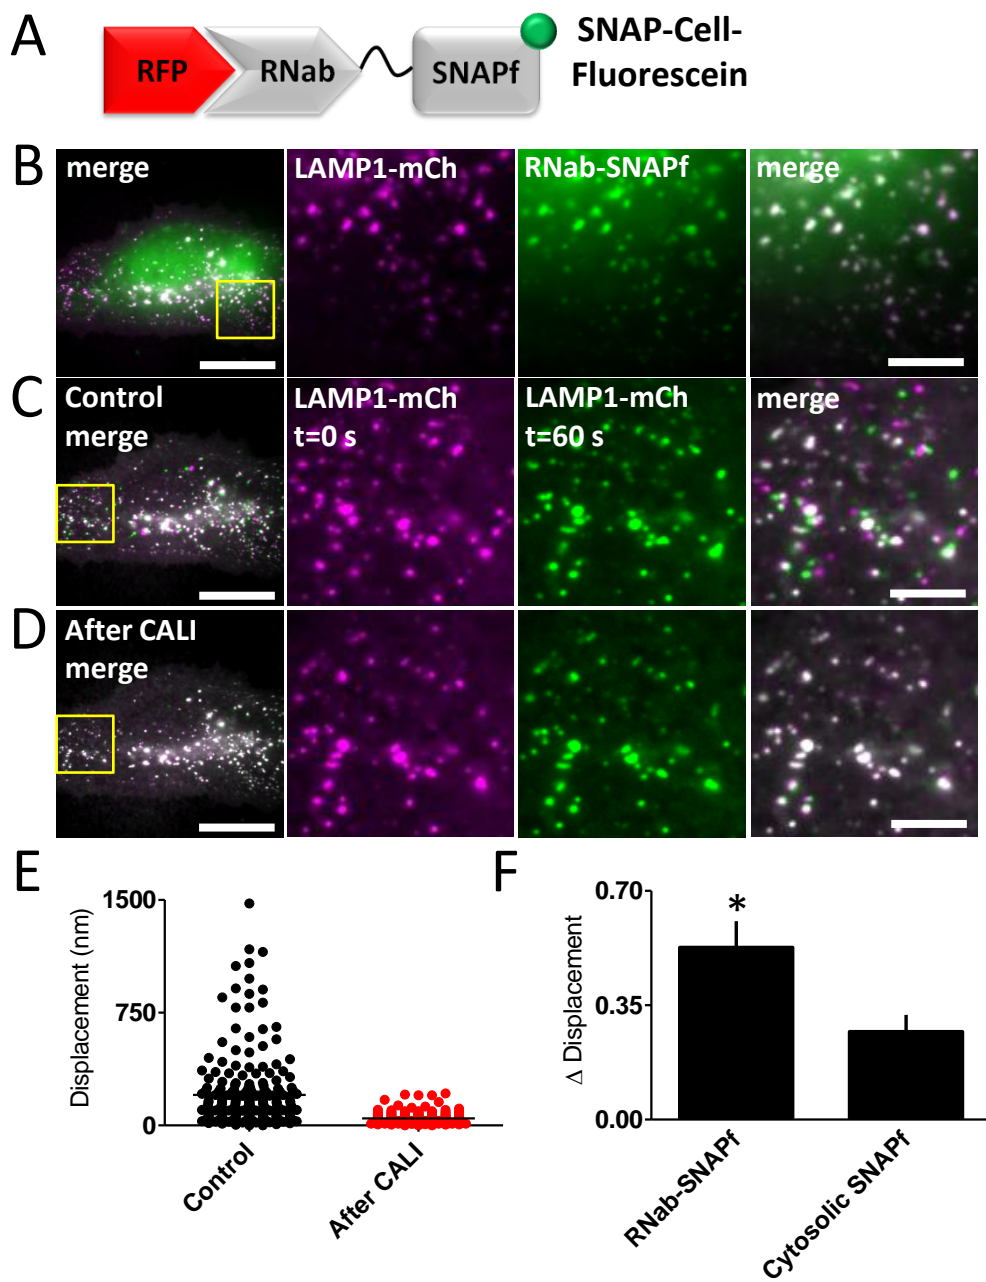

Figure 8.

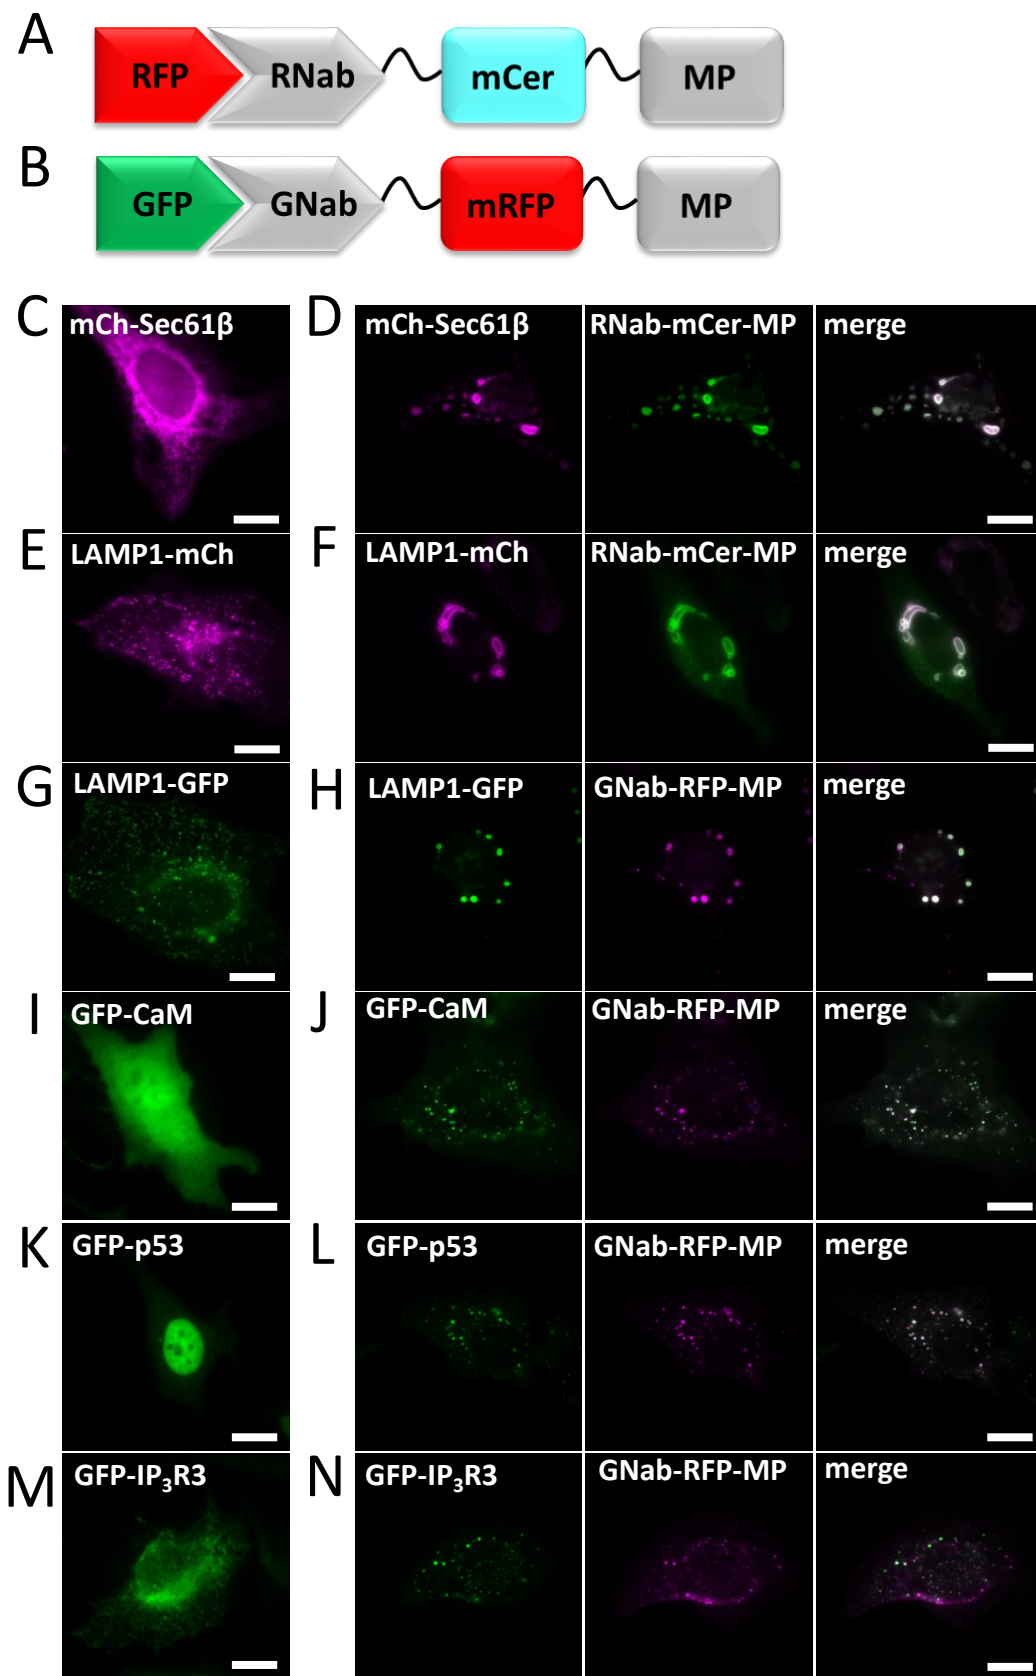

Figure 9.

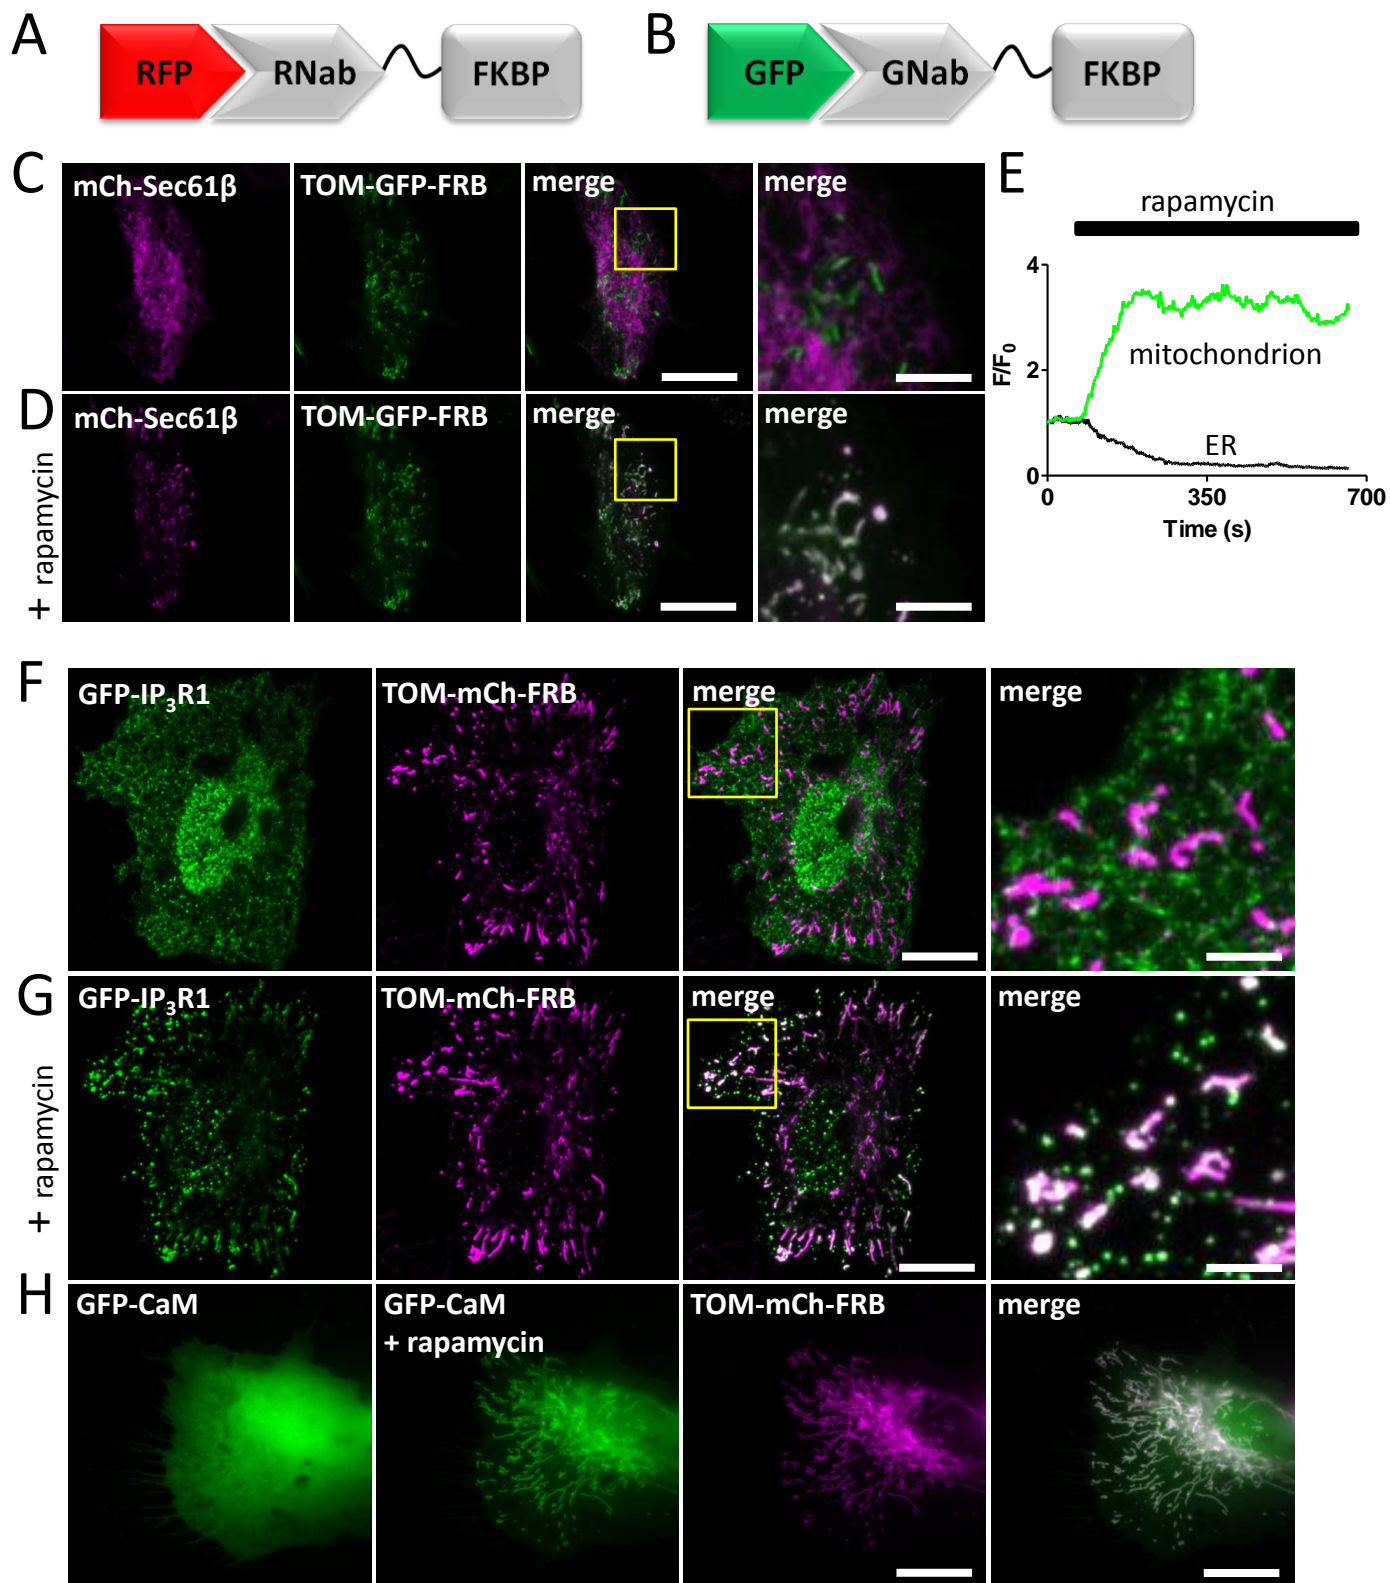

Figure 10.



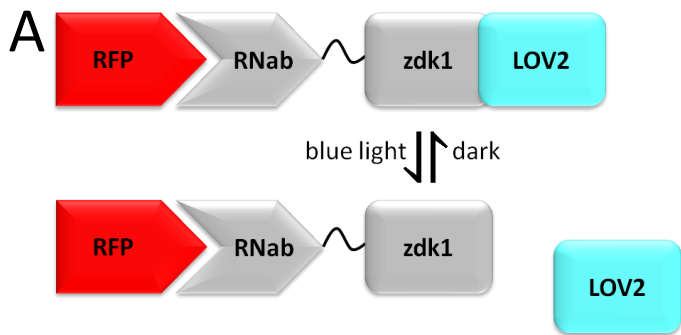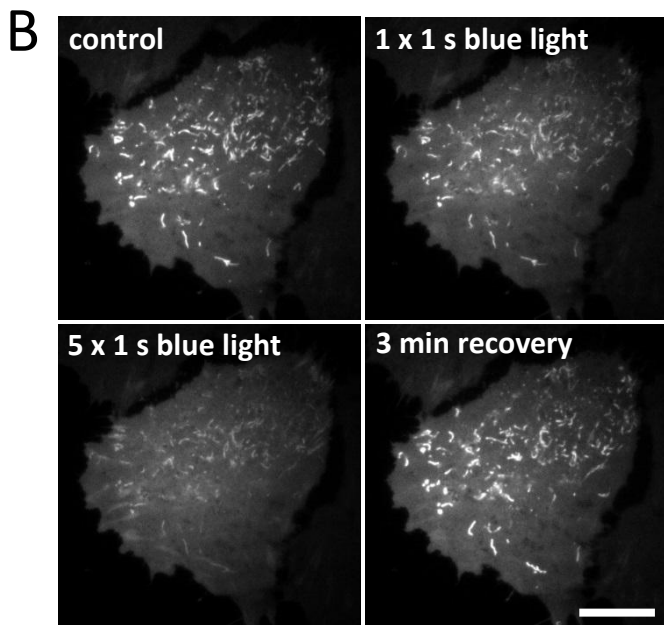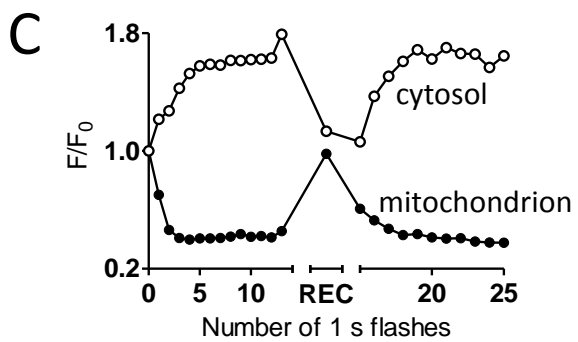

**Figure 11.**

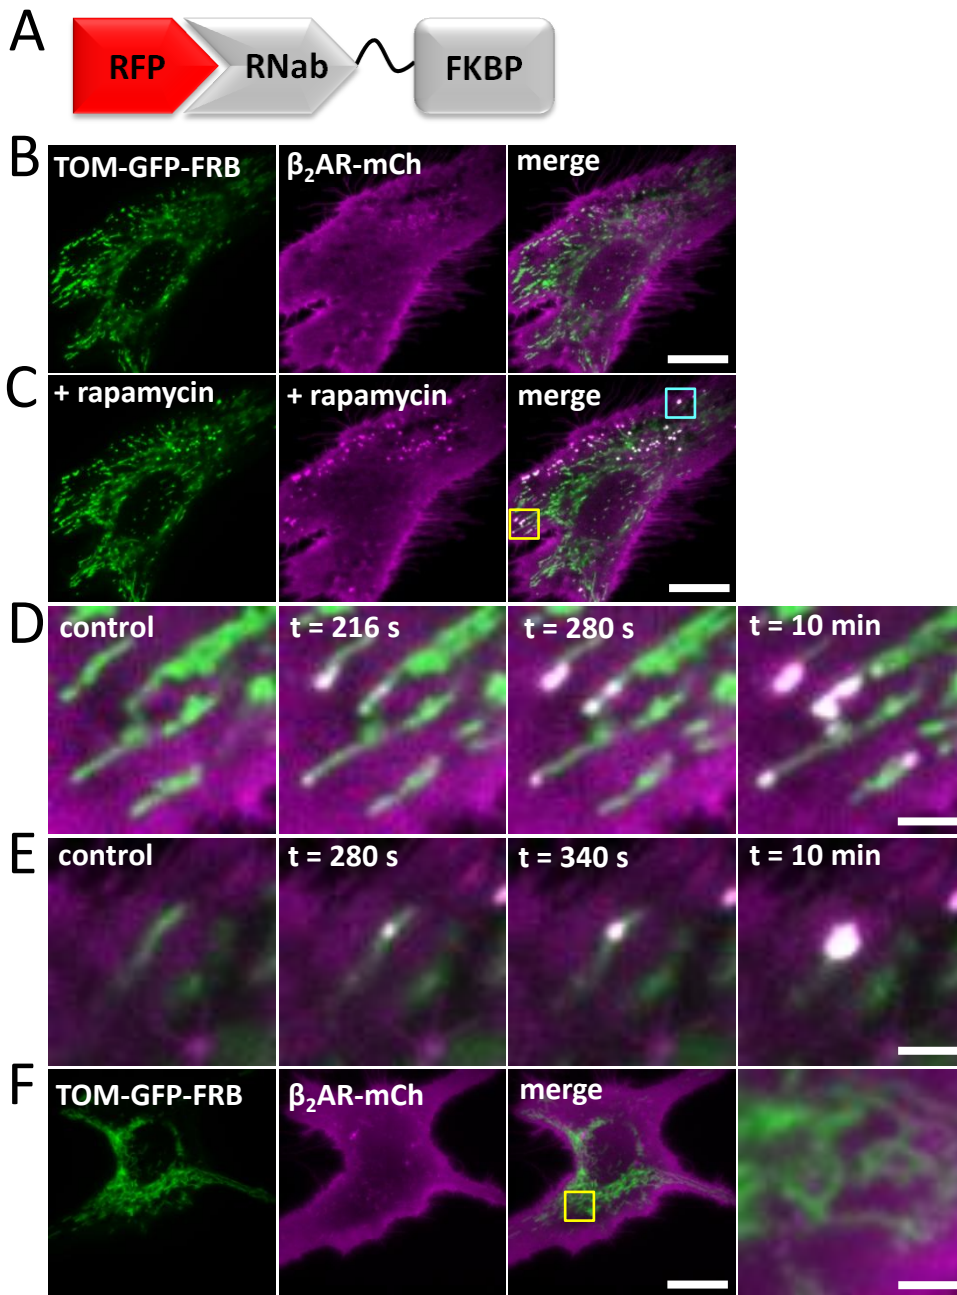

Figure 12.

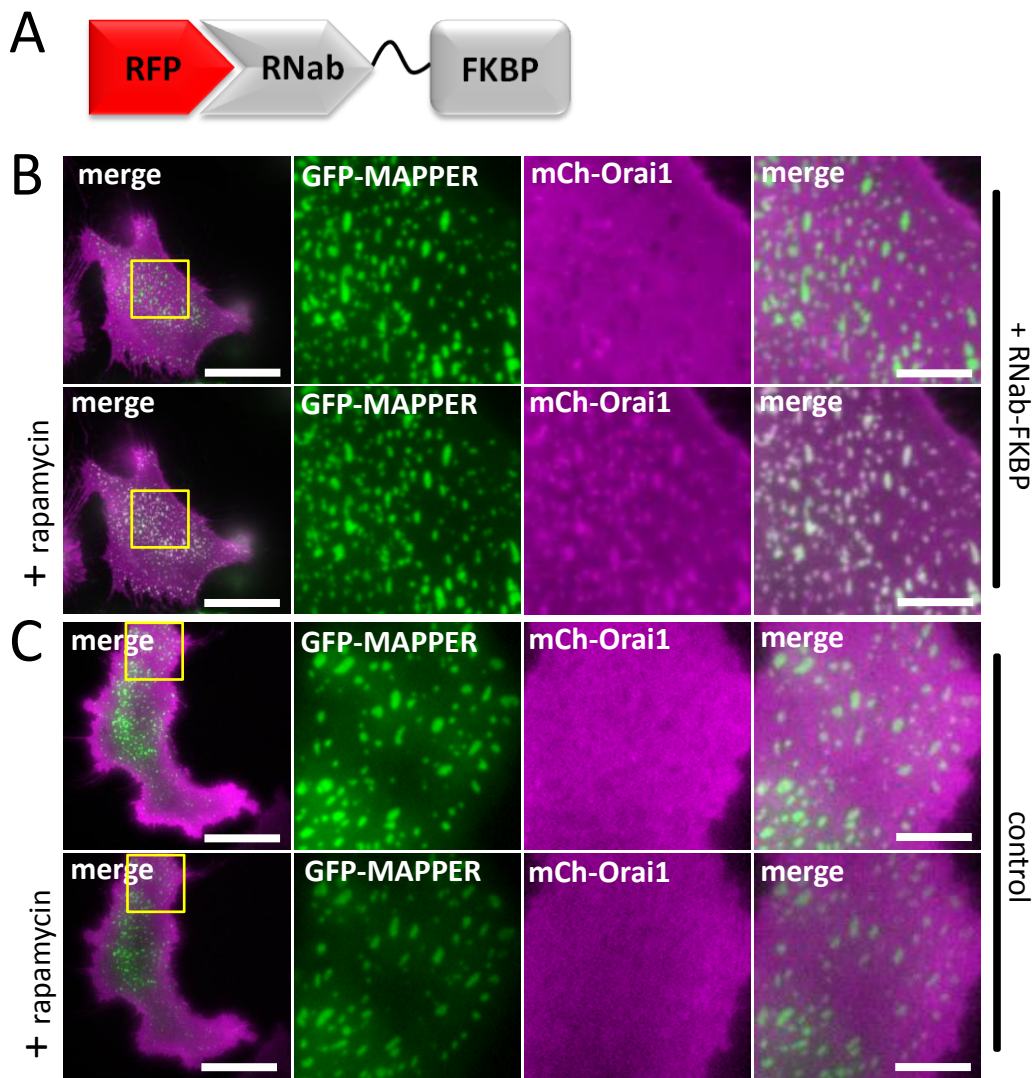

Figure 13.

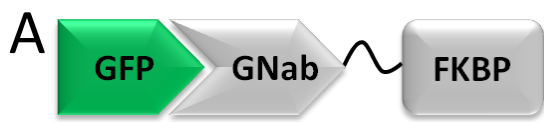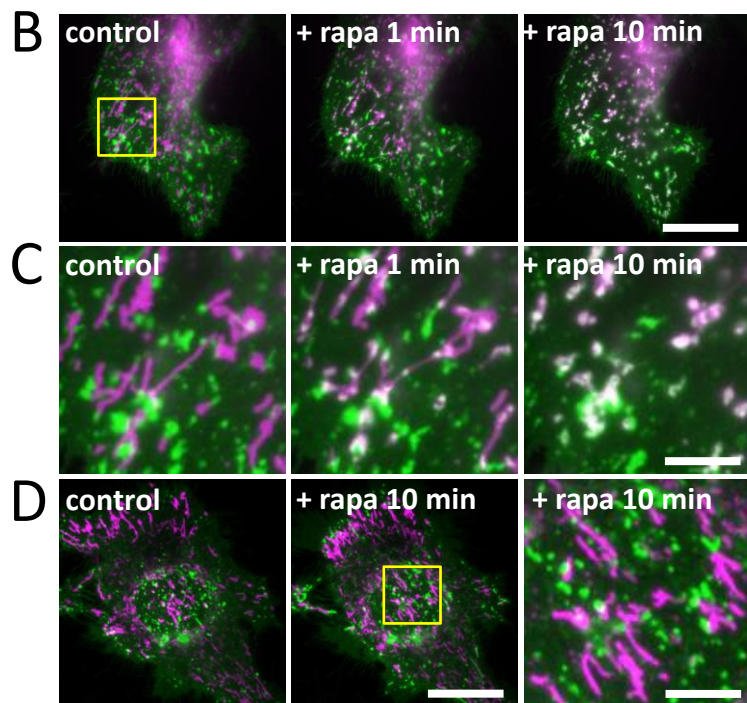

**Figure 14.**

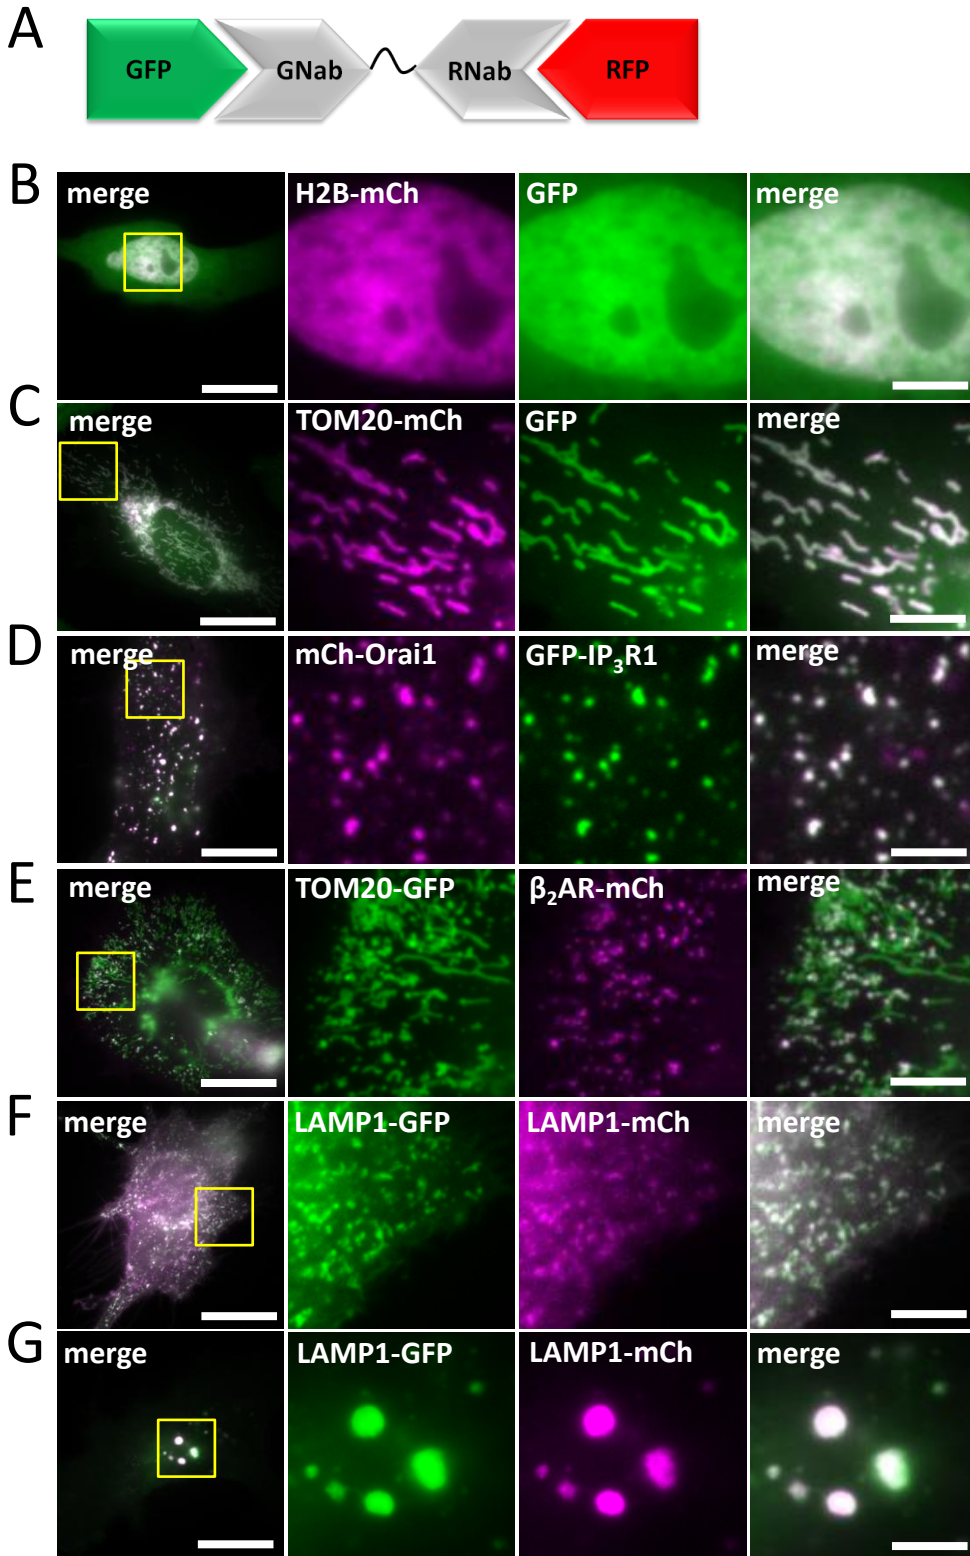

Figure 15.

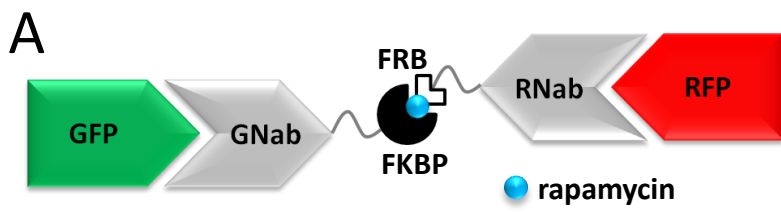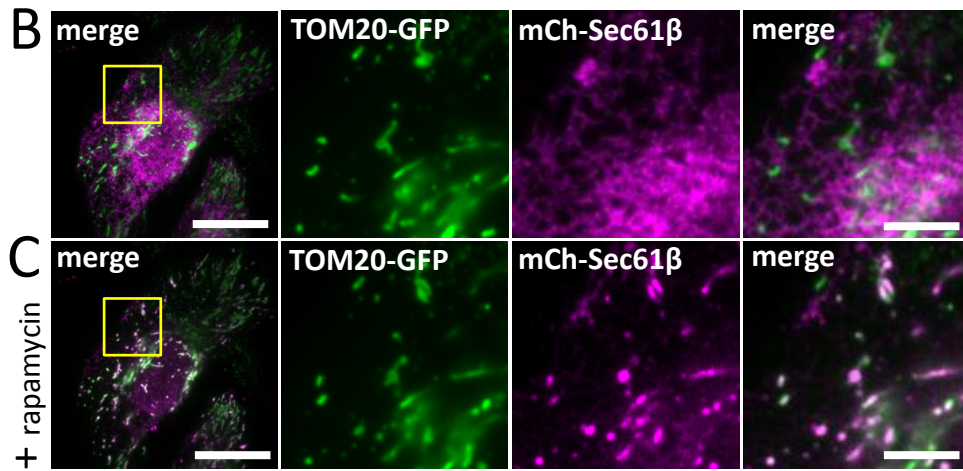

Figure 16.

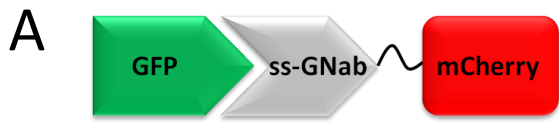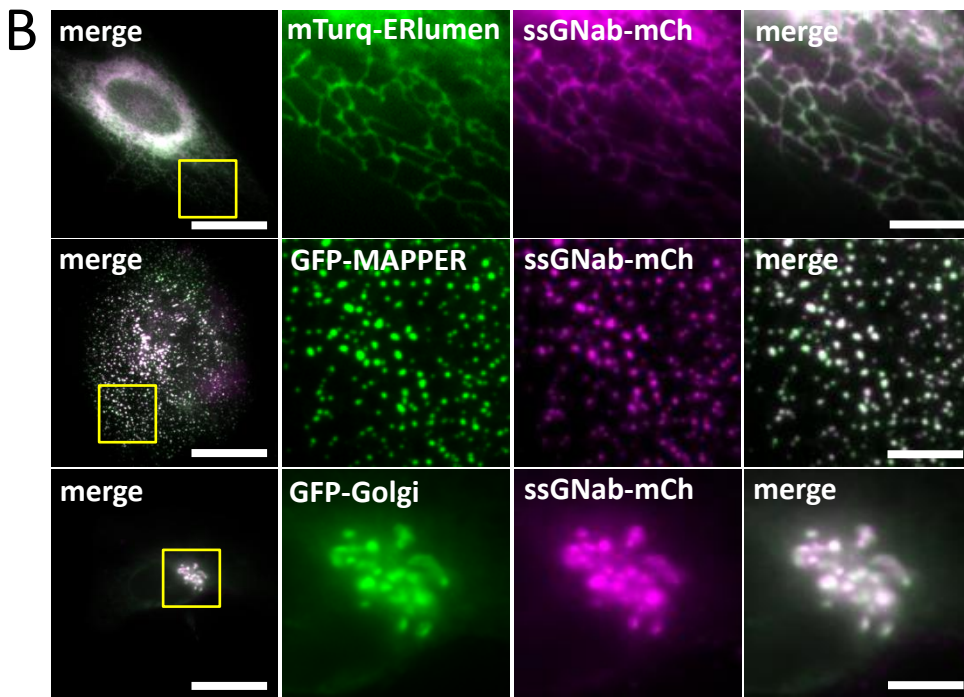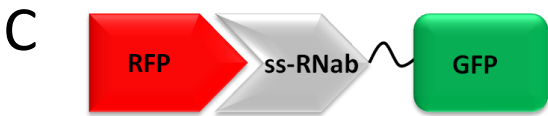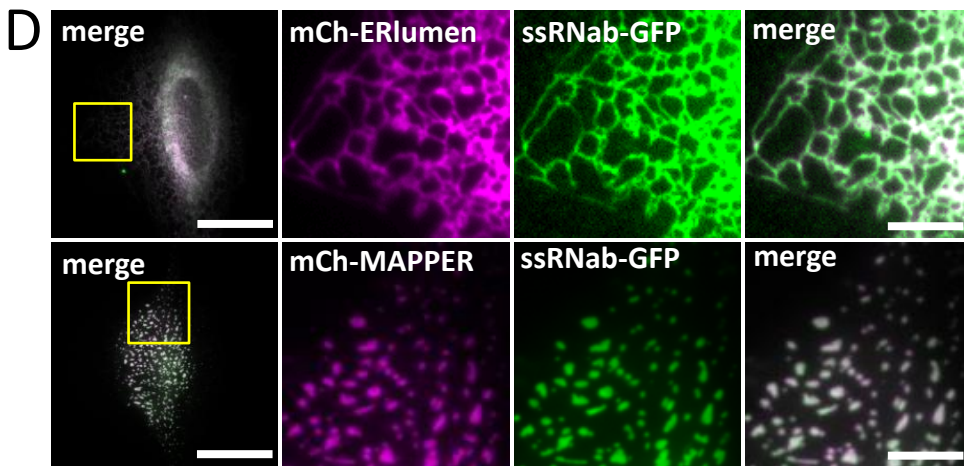

Figure 17.

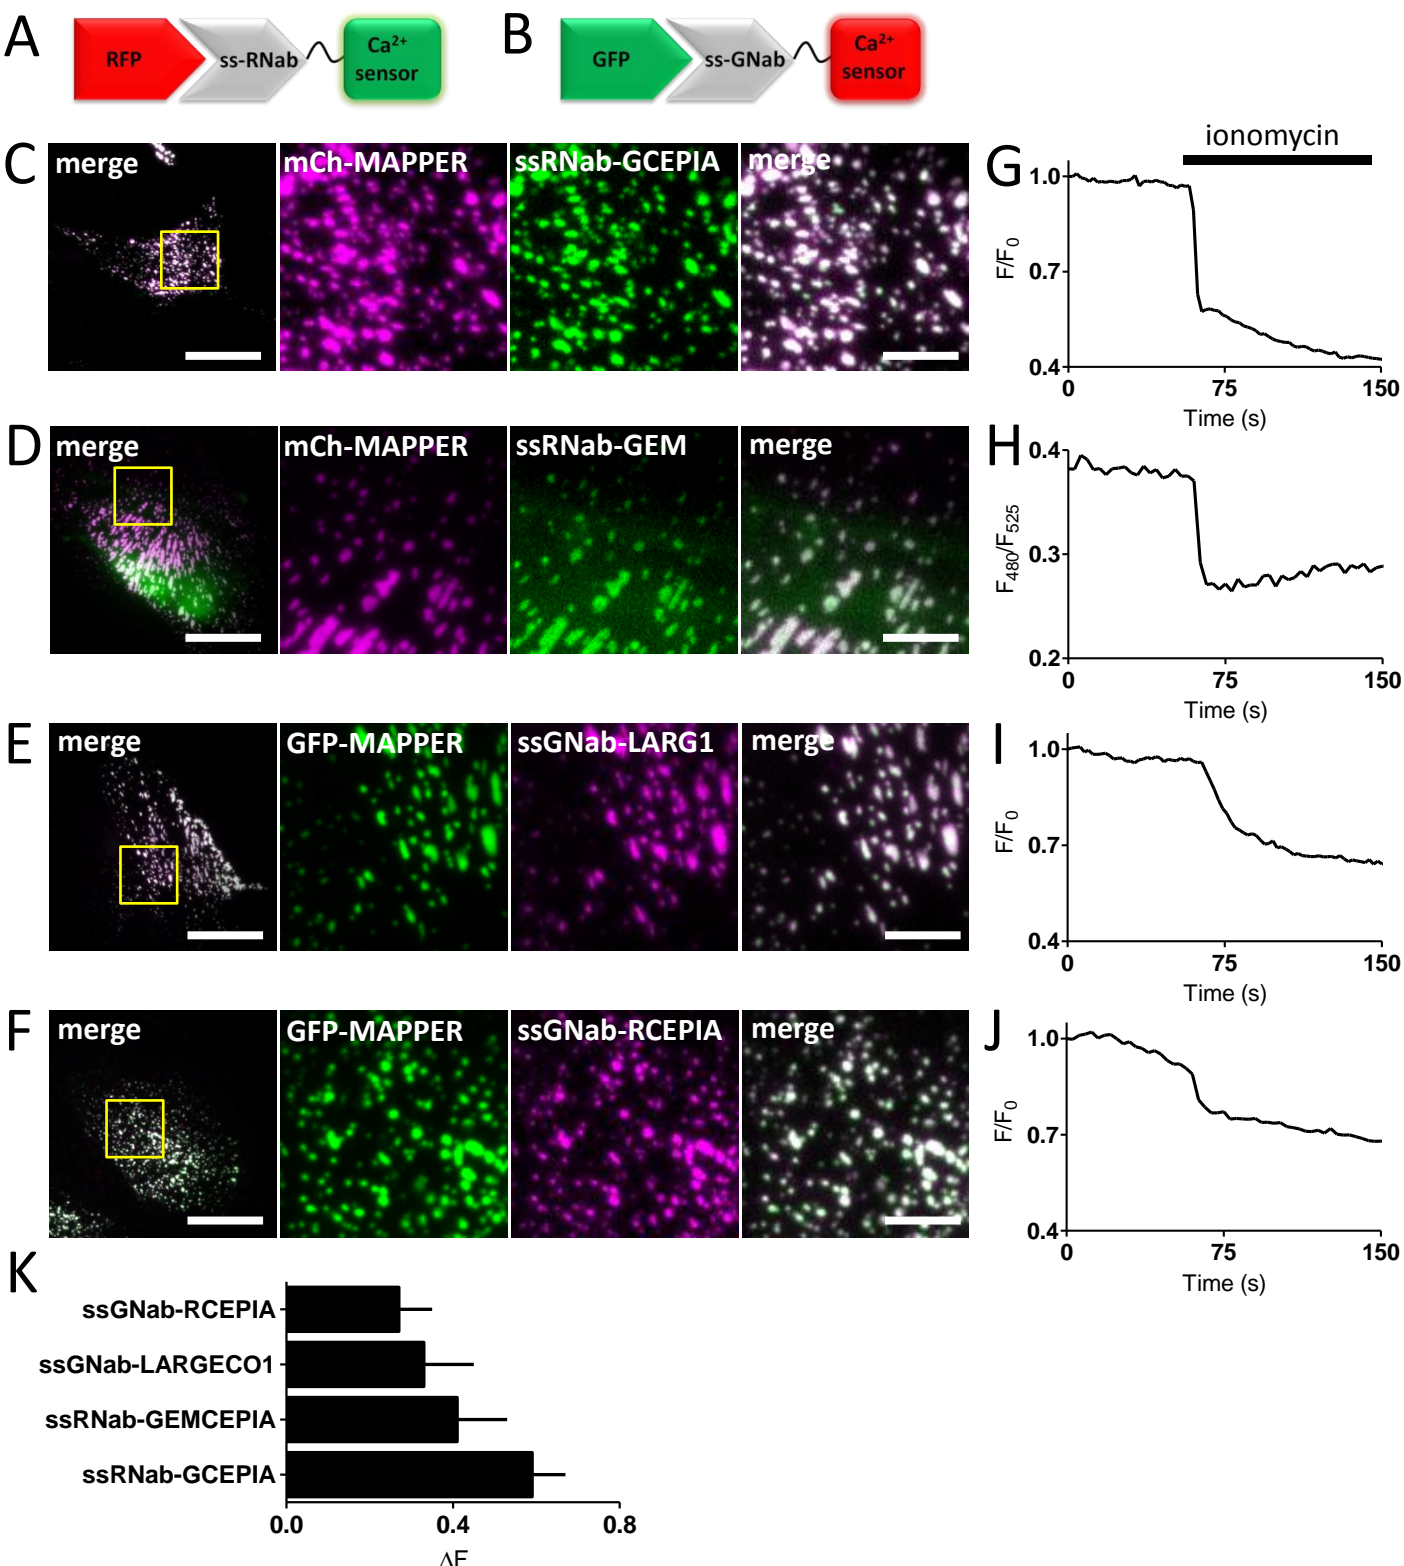

**Figure 18.**
