# Supplementary material for: A genetically-encoded toolkit of functionalized nanobodies against fluorescent proteins for visualizing and manipulating intracellular signalling
Source: bioRxiv or medRxiv preprint supplement (doi:10.1101/544700), 2019-04-26
Supplement: Supplementary file [file media-1.pdf]

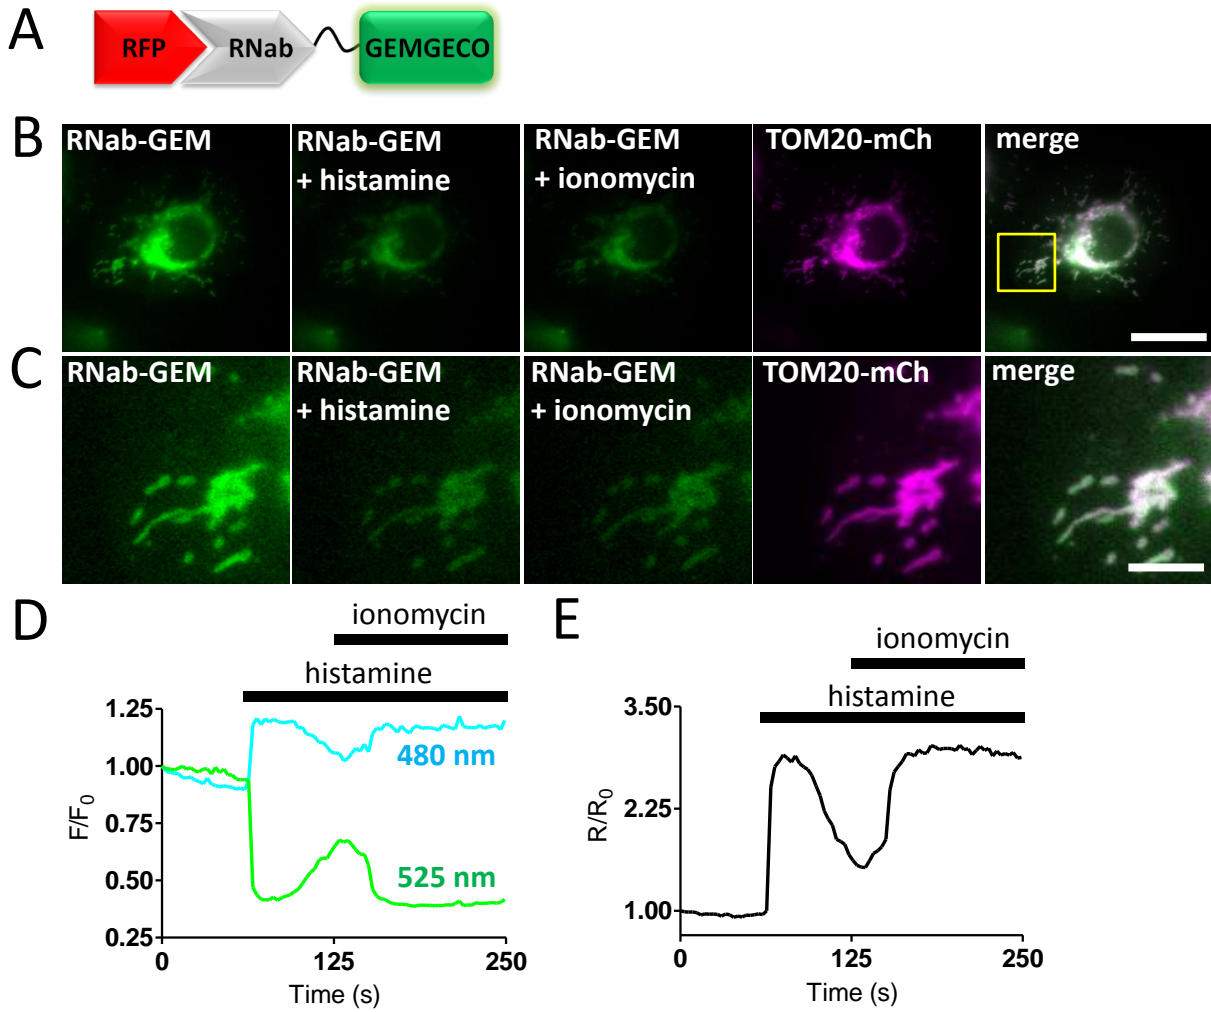

Figure S1

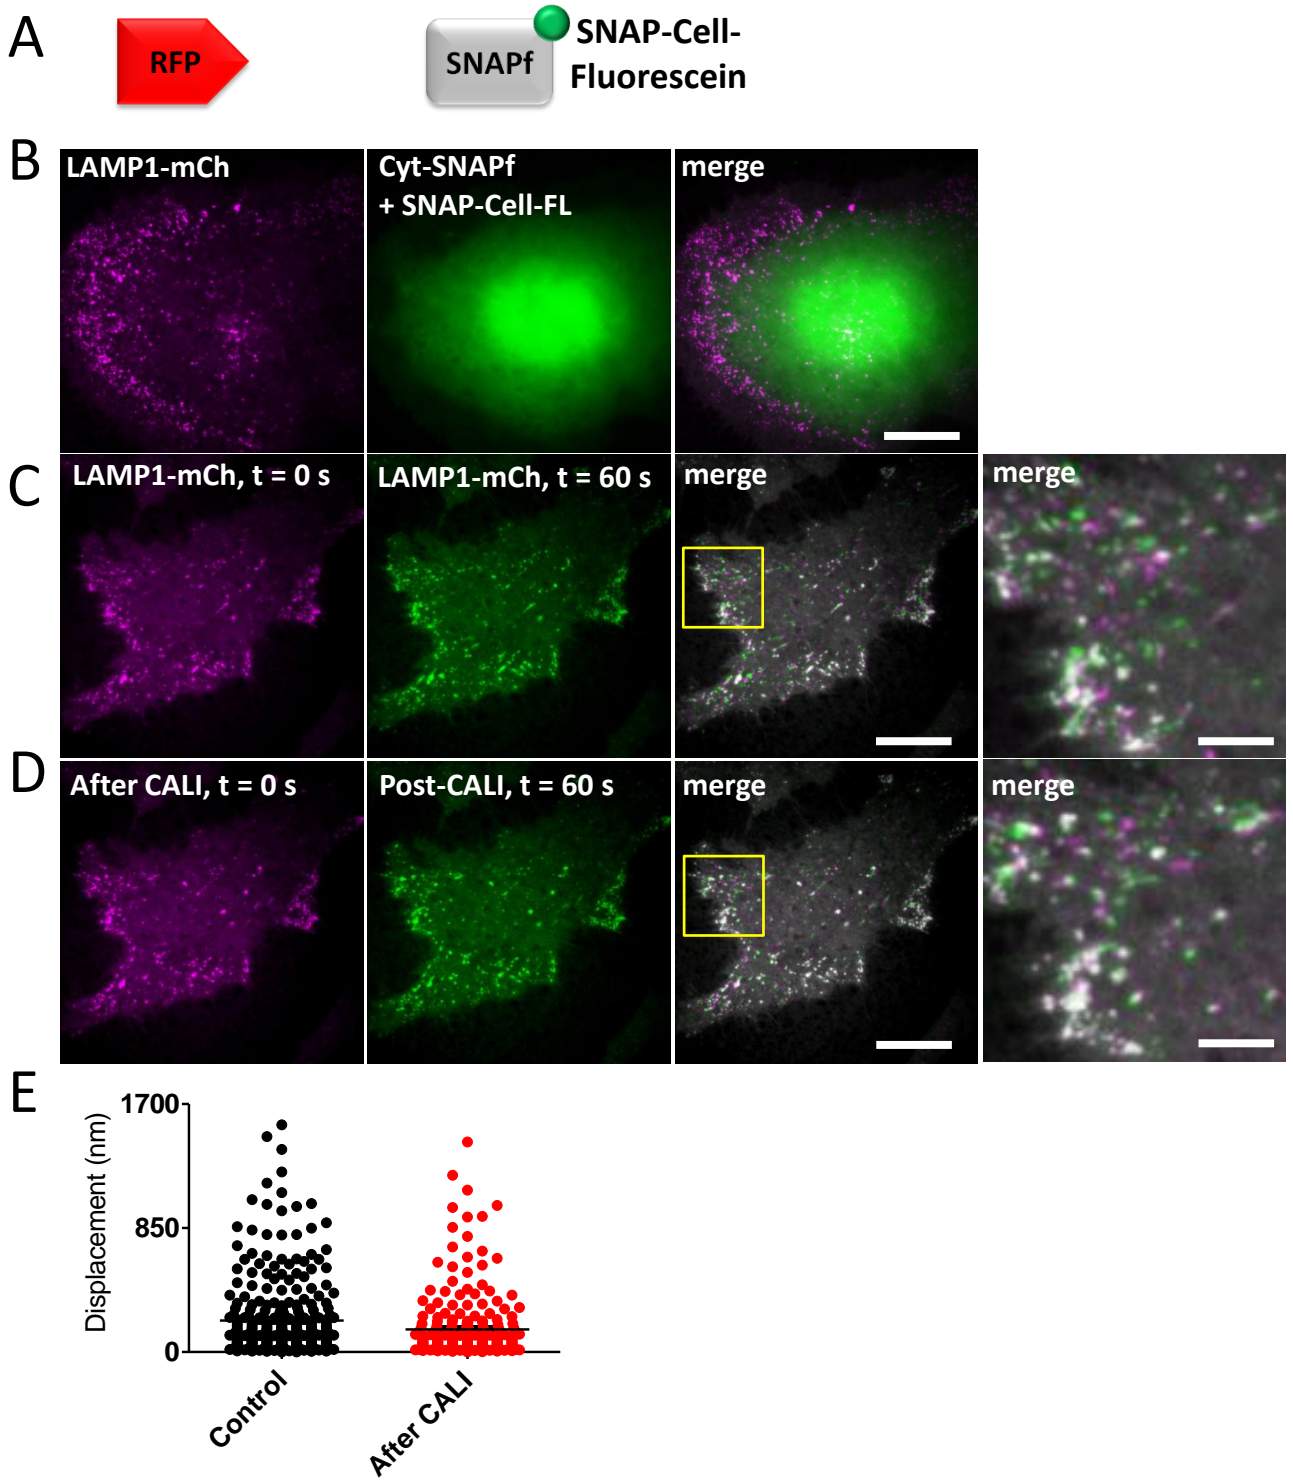

Figure S2

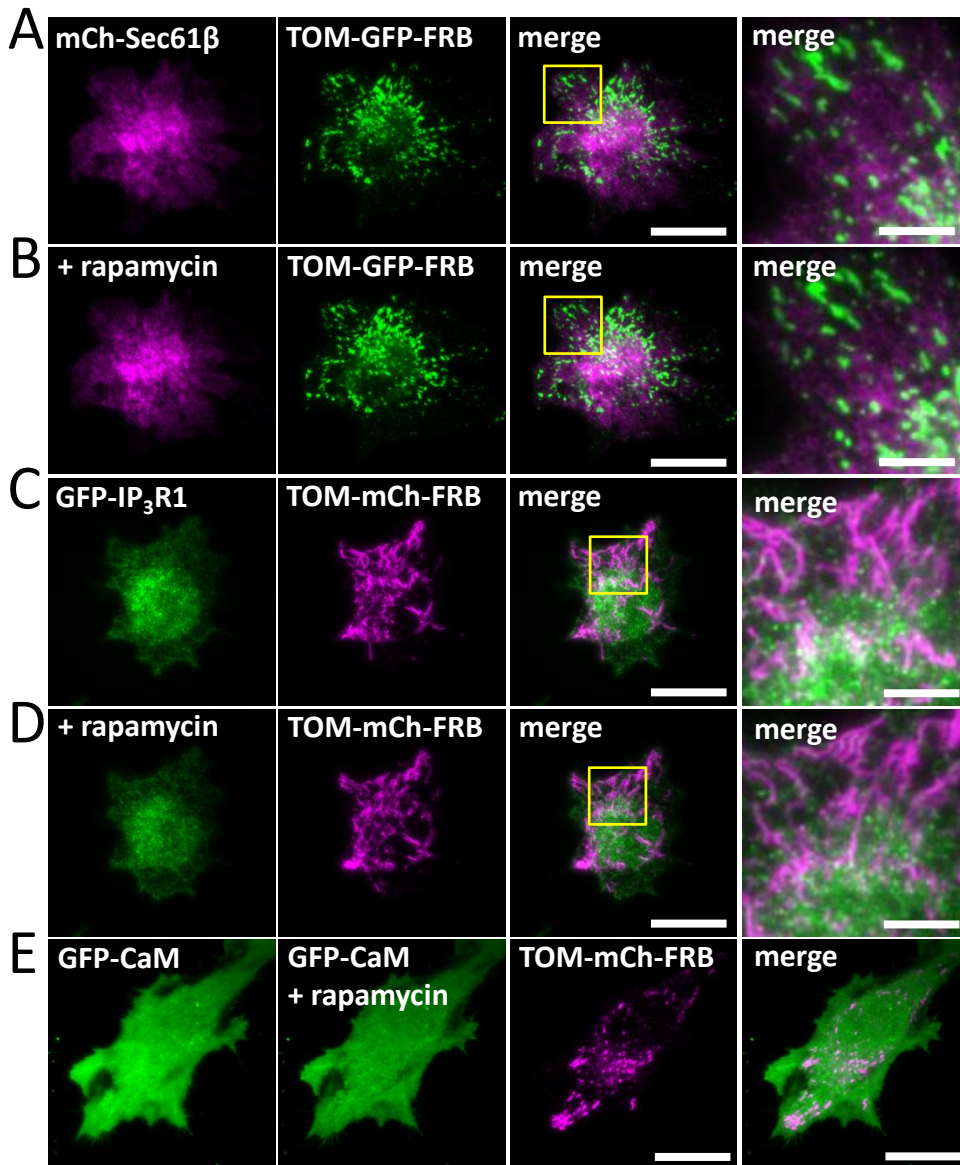

Figure S3

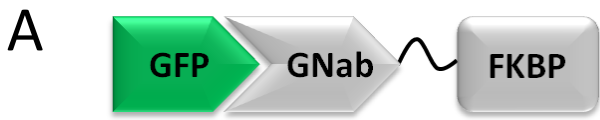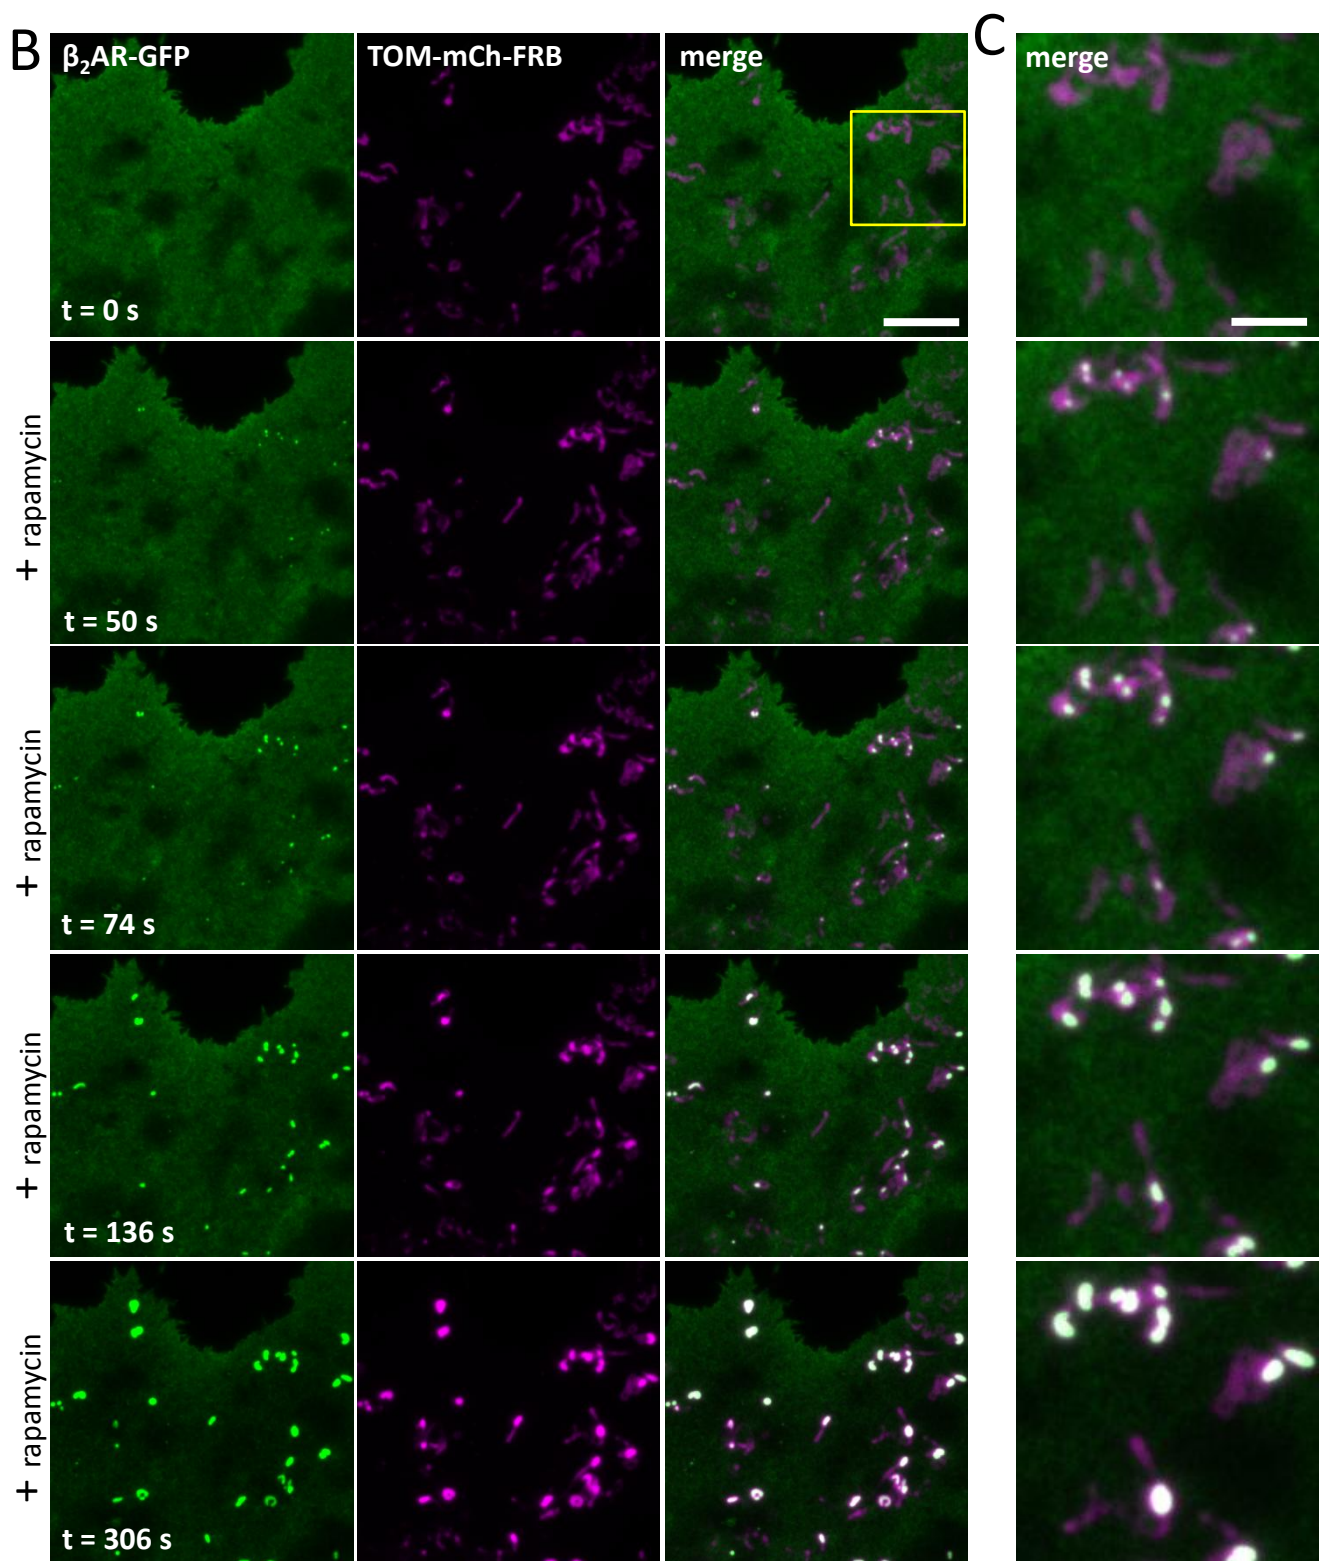

Figure S4

**A**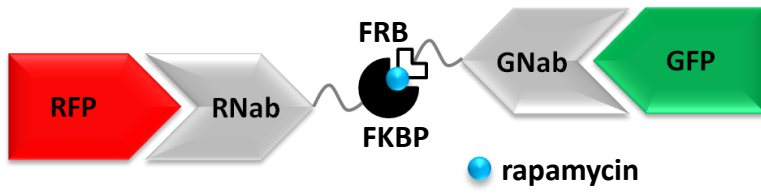**B**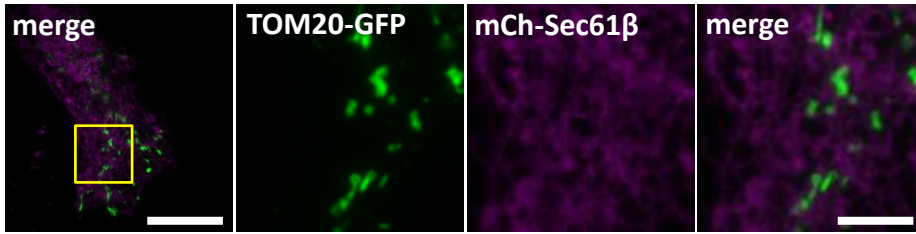**C**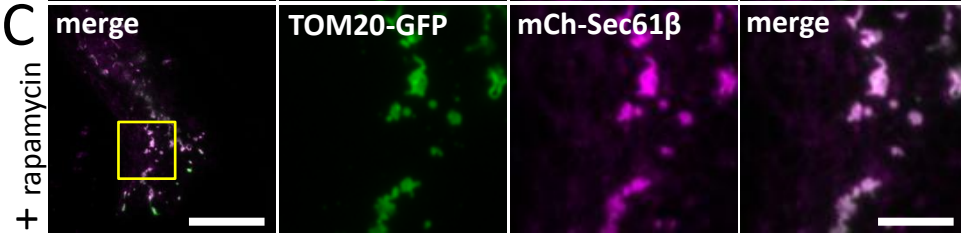

**Figure S6.** DNA sequences encoding the nanobodies used.

**ATG** – start codon of region encoding nanobody

**NANOBODY** – region encoding nanobody

**LINKER** – region encoding flexible linker between nanobody and functional module

**TXX** – stop codon

### **GNab**

AAGCTTGCCACC**ATG**GCTCAGGTGCAGCTGGTGAATCTGGCGGCAGACTGGTGCAGGC  
CGGCGATAGCCTGAGACTGTCTTGTGCCGCCAGCGGCAGAACCTTCAGCACATCTGCCAT  
GGCCTGGTTCAGACAGGCCCTGGCCGCGAGAGGGAATTTGTGGCCGCCATCACATGGA  
CCGTGGGCAACACCATCCTGGGCGACAGCGTGAAGGGCCGTTACCATCAGCCGGGAC  
AGAGCCAAGAACACCGTGGACCTCCAGATGGACAACCTGGAACCCGAGGACACCGCCGT  
GTACTACTGCTCCGCCAGATCCAGAGGCTACGTGCTGTCCGTGCTGCGGAGCGTGGACAG  
CTACGATTATTGGGGCCAGGGCACCCAAGTGACCGTGTCTGGCGGCGGAGGAAGC**GGAG**  
**GCGGAGGATCTGGGGGAGGCGGCAGTGGCGGAGGGGATCT**GGATCC

### **RNab**

AAGCTTGCCACC**ATG**GCTCAGGTGCAGCTGGTGAAGCGGCGGCTCTCTGGTGCAGCC  
TGGCGGATCTCTGAGACTGAGCTGTGCCGCCAGCGGCAGATTTGCCGAGAGCAGCAGCA  
TGGGCTGGTTCAGACAGGCCCTGGCAAAGAACCGGAGTTCGTGGCCGCCATCTCTTGG  
AGCGGCGGAGCCACCAATTACGCCGATAGCGCCAAGGGCCGTTACCCCTGAGCCGGGA  
CAACACCAAGAACACCGTGTACCTGCAGATGAACAGCCTGAAGCCGACGACACCGCCG  
TGTACTACTGCGCCGCAACCTGGGCAACTACATCAGCAGCAACCAGCGGCTGTACGGC  
TACTGGGGCCAGGGAACACAAGTGACCGTGTCCAGCCCTTTCACA**GGCGGCGGAGGATC**  
**TGGCGGAGGCGGATCTGGGGGCGGAGGCTCT**GGATCC

### **GNab-RNab**

AAGCTTGCCACC**ATG**GCTCAGGTGCAGCTGGTTGAATCTGGCGGCAGACTGGTTCAGGCC  
GGCGATTCTCTGAGACTGTCTTGTGCCGCCAGCGGCAGAACCTTTAGCACATCTGCCATG  
GCCTGGTTCAGACAGGCCCTGGAAGAGAACGGGAATTTGTGGCCGCCATCACCTGGAC  
CGTGGGCAATACCATCCTGGGCGATAGCGTGAAGGGCAGATTCACCATCAGCCGGGACA  
GAGCCAAGAACACCGTGGACCTCCAGATGGACAACCTGGAACCTGAGGACACCGCCGTG  
TACTACTGCTCCGCTAGAAGCAGAGGCTACGTGCTGTCCGTGCTGAGAAGCGTGGACAG  
CTACGATTATTGGGGCCAGGGCACCCAAGTGACCGTTTCTGGTGGCGGAGGATCTGGCG  
GAGGTGGAAGCGGCGGAGGCGGTAGCGGAGGTGGTGGATCTGGATCCATGGCCAGGTC  
CAGCTCGTGAAGAGTGGCGGATCTCTGGTTCAACCTGGCGGAAGCCTGAGACTGAGCTG  
TGCCGCTTCTGGCAGATTTGCCGAGAGCAGCAGCATGGGCTGGTTTAGGCAAGCCCCAG  
GCAAAGAGAGAGAGTTCGTCGCCGCCATCTCTTGGAGTGGCGGAGCCACCAATTACGCC  
GATTCTGCCAAAGGCCGTTACCCCTGAGCAGAGACAACACAAAGAATAACGGTGTATCT  
CCAGATGAACTCCCTGAAGCCAGACGATACAGCCGTGTATTATTGCGCCGCCAACCTGG  
GCAACTACATCAGCAGCAACCAGCGGCTGTACGGCTACTGGGGACAGGGAACACAAGTC  
ACAGTGTCTAGCCCCTTACC**TGA**CTGCAGATATC
